# Supplementary material
Source: PubMed Central journal article supplement (PMC7456219)
Supplement: jci-130-135439-s355.pdf [file jci-130-135439-s355.pdf]

## Extended Methods

### RNA extraction from tissue

Skin tissue was homogenized in lysis buffer with Minilys by Bertin Technologies with 30sec homogenizing/30sec break cycle for a total of 3 cycles until tissue was completely disrupted. Alternatively, tissue was homogenized in Trizol (Thermo Fisher Scientific) using a tissue disruptor probe for 3 cycles of 30s pulses. Homogenates were processed for RNA extraction with Qiagen RNeasy Fibrous Tissue kit according to the manufacturer's protocol. RNA concentration was assessed using a spectrophotometer (NanoDrop).

### RNA sequencing

Skin biopsies of three different cohorts were used for RNA sequencing analysis (Cohort 1, PRESS and cohort 3). Total RNA was fractionated to purify mRNA using the Dynabeads mRNA Purification Kit (Thermo Fisher Scientific) to minimize contamination from rRNA. Purified polyA mRNA was used as the template for reverse transcription. After first strand complementary DNA (cDNA) synthesis, the entire single strand cDNA was used for the double strand cDNA synthesis. The MinElute PCR Purification Kit (Qiagen) was used to concentrate the cDNA, and size selection of 200-300bp cDNA was carried out on an agarose gel. Illumina sequencing libraries were generated for the cDNA according to the manufacturer's sample preparation protocol, and then sequenced on the HiSeq2000 platform to generate paired 100bp long reads. Sequence reads was mapped to human genome using Bowtie and then processed with the software package TopHat and Cufflinks. The number of read counts per gene was estimated using HTseq. Differential expression analysis was carried out on variance stabilized counts using DEseq2 package 44 (Bioconductor, <https://www.bioconductor.org/>). In addition, clustering and principal component analyses were performed to screen for technical artefacts related to the date of sample collection, extraction and sequencing. These analyses did not indicate any batch effect. For the PRESS cohort similar procedures were pursued with the difference that a ribosomal reduction instead of poly (A) enrichment method was carried out. Specifically, cDNA libraries were prepared using the TruSeq Stranded Total RNA with Ribo-Zero Gold Kit (Illumina). Moreover, 2X 76 bp paired-end sequencing on HiSeq 2500 (Illumina) was conducted, generating approximately 50 million reads per sample. RNA sequencing performed on the skin biopsies from cohort 3 has been described recently (1).

## **Protein coding capacity**

The LncRNA protein coding capacity was evaluated with the CPAT (<http://rna-cpat.sourceforge.net/>) analysis which is based on four pure sequence-based, linguistic features, ORF size, ORF coverage, Fickett TESTCODE and Hexamer usage bias. Analysis was done using default settings for human sequences, and coding probabilities below 0.364 were considered noncoding as described (2,3).

## **Cells and cell culture**

Human pulmonary artery smooth muscle cells (HPASMC) were purchased from ScienCell and cultured in smooth muscle cell medium (SMCM, ScienCell) supplemented with 1% FBS, 100 units/ml of penicillin, 100 µg/ml of streptomycin and smooth muscle cell growth supplement (all ScienCell). Rheumatoid arthritis synovial fibroblasts (RASFs) were isolated from synovial tissues digested with dispase (37 °C, 1 h) and cultured in DMEM (Sigma-Aldrich) supplemented Penicillin and 50 µg/ml Streptomycin (Gibco) and 10% fetal bovine serum (10% FBS, Gibco), 2 mM L-glutamine, 10 mM HEPES and 0.2% amphotericin B (all from Life Technologies). BJ5TA hTERT-immortalized foreskin fibroblast cell line was purchased from ATCC and kept in medium constituted of four parts of DMEM (Sigma-Aldrich) and one part of Medium 199 (Sigma-Aldrich) supplemented with 0.01 mg/ml hygromycin B (Sigma-Aldrich), 10% fetal bovine serum (10% FBS, Gibco), 50 U/ml Penicillin and 50 µg/ml Streptomycin (Gibco). Human dermal microvascular endothelial cells (HDMEC) were purchased from ScienCell and cultured in endothelial cell medium (SMCM, ScienCell). CD14<sup>+</sup> cells were isolated from blood of SSc patients using CD14 Microbeads (MACS, Miltenyi Biotec) according to the manufacturer's protocol and cultured in DMEM (Sigma-Aldrich) containing 50 U/ml Penicillin and 50 µg/ml Streptomycin (Gibco) and 10% fetal bovine serum (10% FBS, Gibco) and 100 µM 2-mercaptoethanol (Gibco). Purity was confirmed to be >95% by FACS analysis. Primary human keratinocytes (HK) were isolated from healthy skin derived from donors undergoing plastic surgery as previously described (4). Keratinocytes were maintained in keratinocyte-serum-free medium (KSF-M, Gibco) supplied with epidermal growth factor (EGF, Gibco) and Bovine Pituitary Extract (BPE, Gibco). All cell types were maintained in 5% CO<sub>2</sub> humid 37°C incubator.

## **Cytokines and Inhibitors**

For stimulation experiments, starvation medium (1% FBS) was supplemented either with 0.1-10 ng/ml TGFβ (Peprotech), 20 ng/ml PDGF (Peprotech), 10 ng/ml IL-1β (ImmunoTools), 10 ng/ml IL-4 (ImmunoTools), 10 ng/ml IL-13 (ImmunoTools) or 10 ng/ml IL-17a (ImmunoTools) for 6, 24 or 72 h. TGFβR1 was blocked using 100 nM SD208 inhibitor (Tocris) and 10 µM SB431542 inhibitor (Tocris) in parallel to TGFβ treatment. Cells were starved for 24 h prior to stimulation.

### **RNA extraction from cells**

Total RNA from cells was isolated with Zymo Quick-RNA MicroPrep RNA isolation kit. RNA concentration was assessed using a spectrophotometer (NanoDrop).

### **Microarray**

Two-hundred ng of total RNA was amplified and purified using a TotalPrep RNA Amplification Kit (Applied Biosystems/Ambion). Reverse transcription for first strand cDNA was performed using a T7 Oligo(dT) Primer to synthesize cDNA containing a T7 promoter sequence. Single stranded cDNA was then converted into double stranded cDNA and purified. In vitro transcription was used to amplify and label multiple copies of biotinylated cRNA. The amplified cRNA was hybridized on Illumina HT-12 arrays. The R-package 'lumi' was used to read and process the microarray raw data. For differential expression analysis was performed using 'limma' (5). The annotation is based on the R-package 'illuminaHumanv4.db'.

### **Reverse transcription-quantitative polymerase chain reaction (RT-qPCR)**

One hundred twenty-five ng of RNA and random hexamers were used to carry out reverse transcription using the Transcriptor First Strand cDNA Synthesis kit (Roche). Subsequent qPCRs were performed with 2x SYBR Green master mix (Promega) on an Agilent Technologies Stratagene Mx3005P qPCR system. Ribosomal protein lateral stalk subunit P0 (*RPLP0*) and Glyceraldehyde 3-phosphate dehydrogenase (*GAPDH*) were used as reference housekeeping genes. Primer list is provided in Supplementary Table 7.

To analyze the expression of microRNAs, 10ng of RNA were reverse-transcribed using TaqMan MicroRNA Reverse Transcription Kit (Thermo Fisher Scientific) and pre-designed loop specific primers for miR-424 and miR-503 (Assay ID: 000604, 001048, Thermo Fisher Scientific). Pre-designed single TaqMan miRNA assays (Assay ID: 000604, 001048, Thermo Fisher Scientific) and TaqMan Universal Master Mix II, no UNG (Thermo Fisher Scientific) were used to measure the expression levels of miR-424 and miR-503. Expression of U48 small nucleolar RNA (RNU48) was used as endogenous control (Assay ID: 001006, Thermo Fisher Scientific).

### **Murine models**

For bleomycin induced fibrosis, female 8 week old C57Bl6/J mice (Janvier, Le Genest-Saint-Isle, France) were injected intradermally every other day with either 100 bleomycin (0.5-1 mg/ml) or the vehicle NaCl (0.9%) (6) for 4 weeks. Lung fibrosis was induced in female 8 week old C57Bl6/J mice (Janvier, Le Genest-Saint-Isle, France) using intratracheally instilled bleomycin sulfate (Baxter, Kantonsapotheke Zurich, Switzerland) at a dosage of 4-2 U/kg of body weight (7). Control mice received equivalent volumes (50  $\mu$ l) of 0.9% NaCl solution. For AdTGF $\beta$ R1-induced fibrosis, 12-week-old mice (C57BL/6 background, Janvier, Le Genest-Saint-Isle,

France, mixed genders) received of  $6.67 \times 10^7$  pfu/mouse of replication-deficient type 5 adenoviruses encoding for constitutively active TGF $\beta$ R1 into marked areas of the upper back every other week for two months. Injections of replication-deficient type 5 adenoviruses encoding for *LacZ* were used as controls (8). TSK-1 mice (10 weeks of age, mixed genders) were interbred with pa/pa mice (The Jackson Laboratory, Bar Harbor, ME, USA). TSK-1 mice spontaneously develop increased dermal and hypodermal thickness as result of a partial in-frame duplication in the fibrillin-1 gene.

### **Bioinformatics analysis for ATAC-seq and ChIRP data**

Data analysis for ChIRP-seq and ATAC-seq experiments was performed using the data analysis framework SUSHI (9). The raw reads were first cleaned by removing adapter sequences, trimming low quality ends, and filtering reads with low quality (phred quality <20) using Trimmomatic (10). Sequence alignment of the resulting high-quality reads to the Human genome (build GRCh38) was performed using Bowtie2 (Version 2.3.2) (11) with non-default options for the ATAC-Seq data: --no-mixed --no-discordant --very-sensitive -X 1500. For peak calling we used MACS2 (12). The resulting peaks were merged using Bedtools. The peak annotation to the closest transcription start site (TSS) was performed with the R-package ChIPpeakAnno using Ensembl's gene models of release 91 downloaded on February 26, 2018. The count values were computed with the function featureCounts from the R package R subread. Differential Count analysis was performed with the software package EdgeR (13).

### **Database search**

WashU Epigenome Browser (<http://epigenomegateway.wustl.edu/browser/>) was used to navigate chromatin immunoprecipitation with sequencing (ChIP-seq) data for histone 3 lysine 27 acetylation (H3K27ac) and histone 3 lysine 4 mono-methylation (H3K4me1) performed in primary human dermal fibroblast. ChIP-seq data visualized with WashU Epigenome Browser (14) derived from other large consortia such as Encyclopedia Of DNA Elements (ENCODE) (15). University of California Santa Cruz (UCSC) Genome Browser (<https://genome.ucsc.edu/cgi-bin/hgGateway>) (16) was used to navigate Ensembl Regulatory Build (17) data for DNA regulatory elements specific for primary human dermal fibroblast or fibroblast cell line (IMR90). UCSC Genome Browser was also used to access GeneHancer (18) database and predict gene-enhancer interactions, specifically 3D Genome Browser (<http://promoter.bx.psu.edu/hi-c/index.html>) (19) was used to visualize chromatin interaction data in the IMR90 cells obtained from Hi-C experiments (20).

## References

1. Messemaker TC, Chadli L, Cai G, et al. Antisense Long Non-Coding RNAs Are Deregulated in Skin Tissue of Patients with Systemic Sclerosis. *J Invest Dermatol.* 2018;138(4):826-835.
2. Fickett JW. Recognition of protein coding regions in DNA sequences. *Nucleic Acids Res.* 1982;10(17):5303-5318.
3. Fickett JW, Tung CS. Assessment of protein coding measures. *Nucleic Acids Res.* 1992;20(24):6441-6450.
4. Aasen T, Belmonte JCI. Isolation and cultivation of human keratinocytes from skin or plucked hair for the generation of induced pluripotent stem cells. *Nat Protoc.* 2010;5:371.
5. Ritchie ME, Phipson B, Wu D, et al. limma powers differential expression analyses for RNA-sequencing and microarray studies. *Nucleic Acids Res.* 2015;43(7):e47-e47.
6. Dees C, Akhmetshina A, Zerr P, et al. Platelet-derived serotonin links vascular disease and tissue fibrosis. *J Exp Med.* 2011;208(5):961-972.
7. Schniering J, Benešová M, Brunner M, et al. Visualisation of interstitial lung disease by molecular imaging of integrin  $\alpha\beta 3$  and somatostatin receptor 2. *Ann Rheum Dis.* 2019;78(2):218 LP - 227.
8. Chakraborty D, Šumová B, Mallano T, et al. Activation of STAT3 integrates common profibrotic pathways to promote fibroblast activation and tissue fibrosis. *Nat Commun.* 2017;8(1):1130.
9. Hatakeyama M, Opitz L, Russo G, Qi W, Schlapbach R, Rehrauer H. SUSHI: an exquisite recipe for fully documented, reproducible and reusable NGS data analysis. *BMC Bioinformatics.* 2016;17(1):228.
10. Bolger AM, Lohse M, Usadel B. Trimmomatic: a flexible trimmer for Illumina sequence data. *Bioinformatics.* 2014;30(15):2114-2120.
11. Langmead B, Salzberg SL. Fast gapped-read alignment with Bowtie 2. *Nat Methods.* 2012;9(4):357-359.
12. Zhang Y, Liu T, Meyer CA, et al. Model-based Analysis of ChIP-Seq (MACS). *Genome Biol.* 2008;9(9):R137.
13. Robinson MD, McCarthy DJ, Smyth GK. edgeR: a Bioconductor package for differential expression analysis of digital gene expression data. *Bioinformatics.* 2009;26(1):139-140.
14. Li D, Hsu S, Purushotham D, Sears RL, Wang T. WashU Epigenome Browser update 2019. *Nucleic Acids Res.* 2019;47(W1):W158-W165.
15. Dunham I, Kundaje A, Aldred SF, et al. An integrated encyclopedia of DNA elements in the human genome. *Nature.* 2012;489(7414):57-74.
16. Lee CM, Barber GP, Casper J, et al. UCSC Genome Browser enters 20th year. *Nucleic Acids Res.* November 2019.
17. Flicek P, Amode MR, Barrell D, et al. Ensembl 2014. *Nucleic Acids Res.* 2013;42(D1):D749-D755.
18. Fishilevich S, Nudel R, Rappaport N, et al. GeneHancer: genome-wide integration of enhancers and target genes in GeneCards. *Database.* 2017;2017.
19. Wang Y, Song F, Zhang B, et al. The 3D Genome Browser: a web-based browser for visualizing 3D genome organization and long-range chromatin interactions. *Genome Biol.* 2018;19(1):151.
20. Rao SSP, Huntley MH, Durand NC, et al. A 3D Map of the Human Genome at Kilobase Resolution Reveals Principles of Chromatin Looping. *Cell.* 2014;159(7):1665-1680.

# Supplementary Figures and Tables

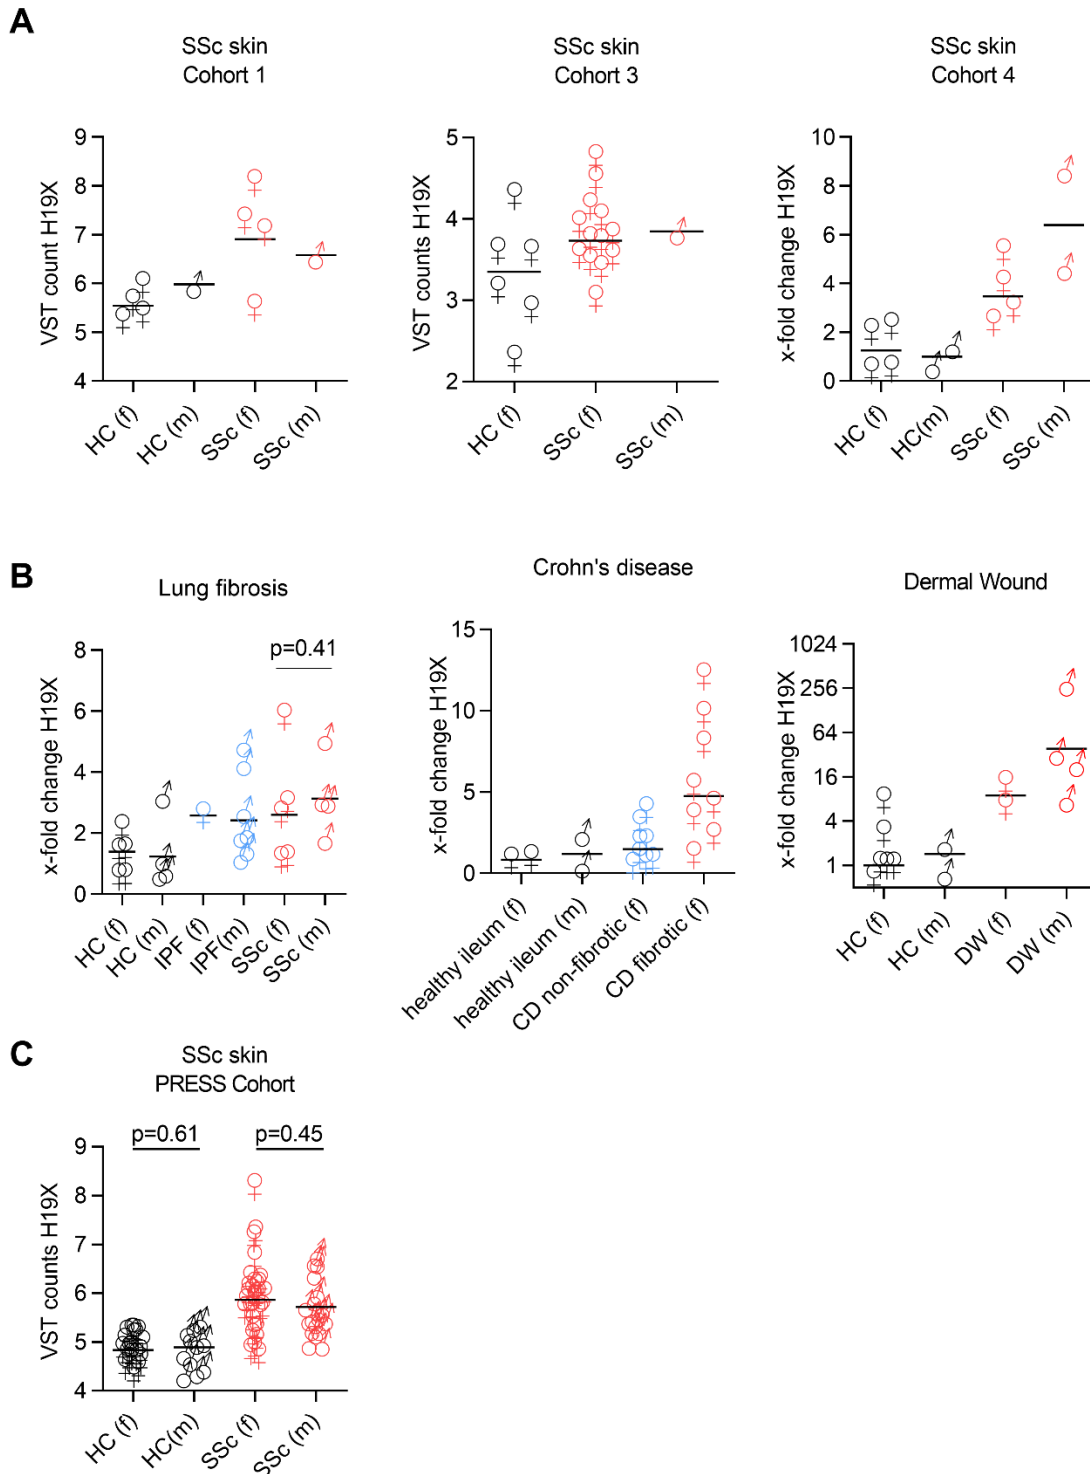

**Supplementary Figure 1.** H19X differential expression in women and men skin (SSc and HC) in the cohort 1 and cohort 3 as measured by RNA-seq. H19X differential expression as measured by qPCR in cohort 4, normalized to *GAPDH* and *RPLP0* (A). H19X differential expression in women and men in other fibrotic diseases (IPF, SSc-ILD, Crohn's disease) and dermal wounds as measured by qPCR with normalization to *GAPDH* and *RPLP0* (B). H19X differential expression in women and men skin (SSc and HC) in the large PRESS cohort as measured by RNA-seq (C). Data are presented as single values and median. Mann-Whitney test (B, lung fibrosis).

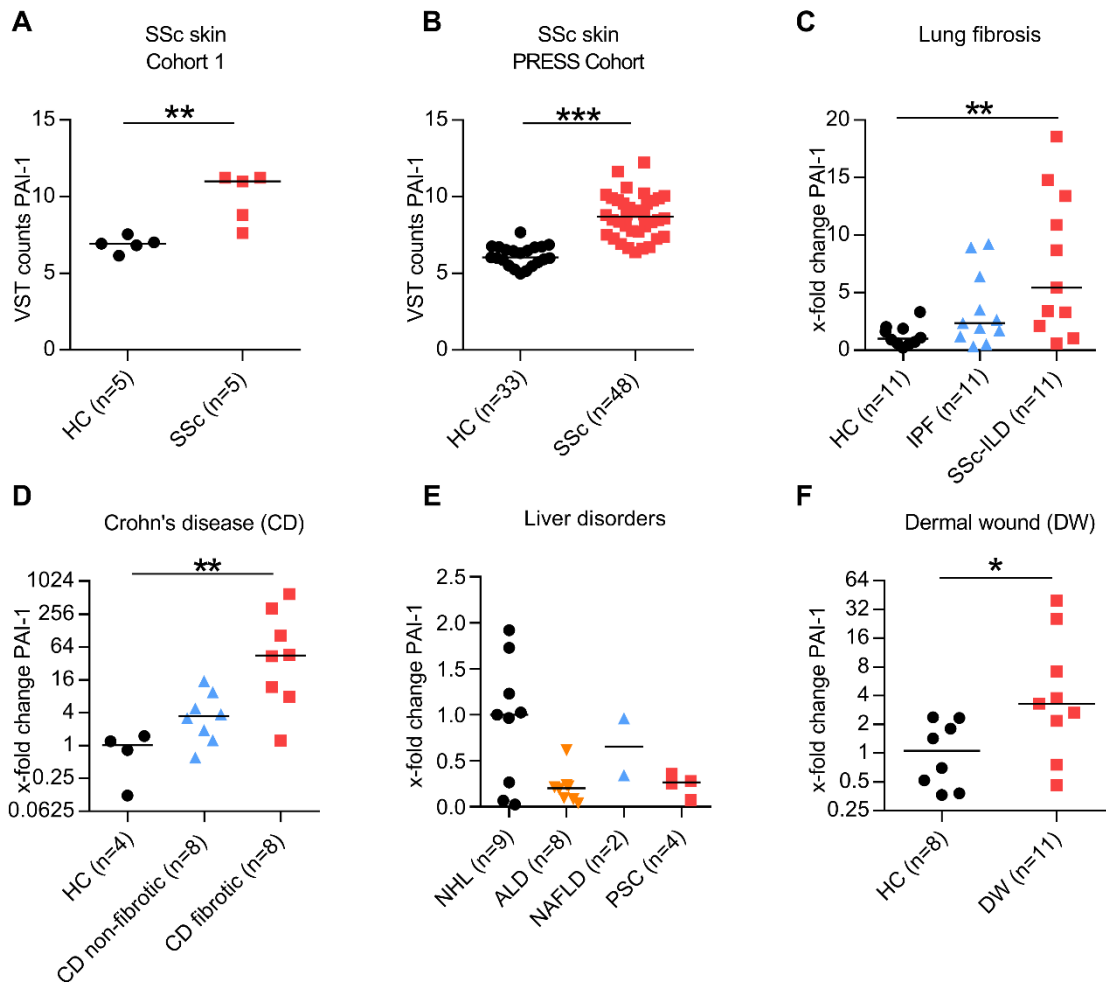

**Supplementary Figure 2.** PAI-1 differential expression in SSc vs HC skin in cohort 1 (A) and the PRESS cohort (B) as measured by RNA-seq. H19X differential expression in ILD-SSc and IPF (C), Crohn's disease (D), PBC (E), and dermal wound (F) as measured by qPCR and normalized to *GAPDH* and *RPLP0*. Data are presented as single values and median. Differential expression analysis was carried out on variance stabilized counts (VST) using DEseq2 package 44 (A, B). Kruskal–Wallis test (C-E). Mann–Whitney test (F). \*\*  $p < 0.01$ , \*\*\*  $p < 0.001$ .

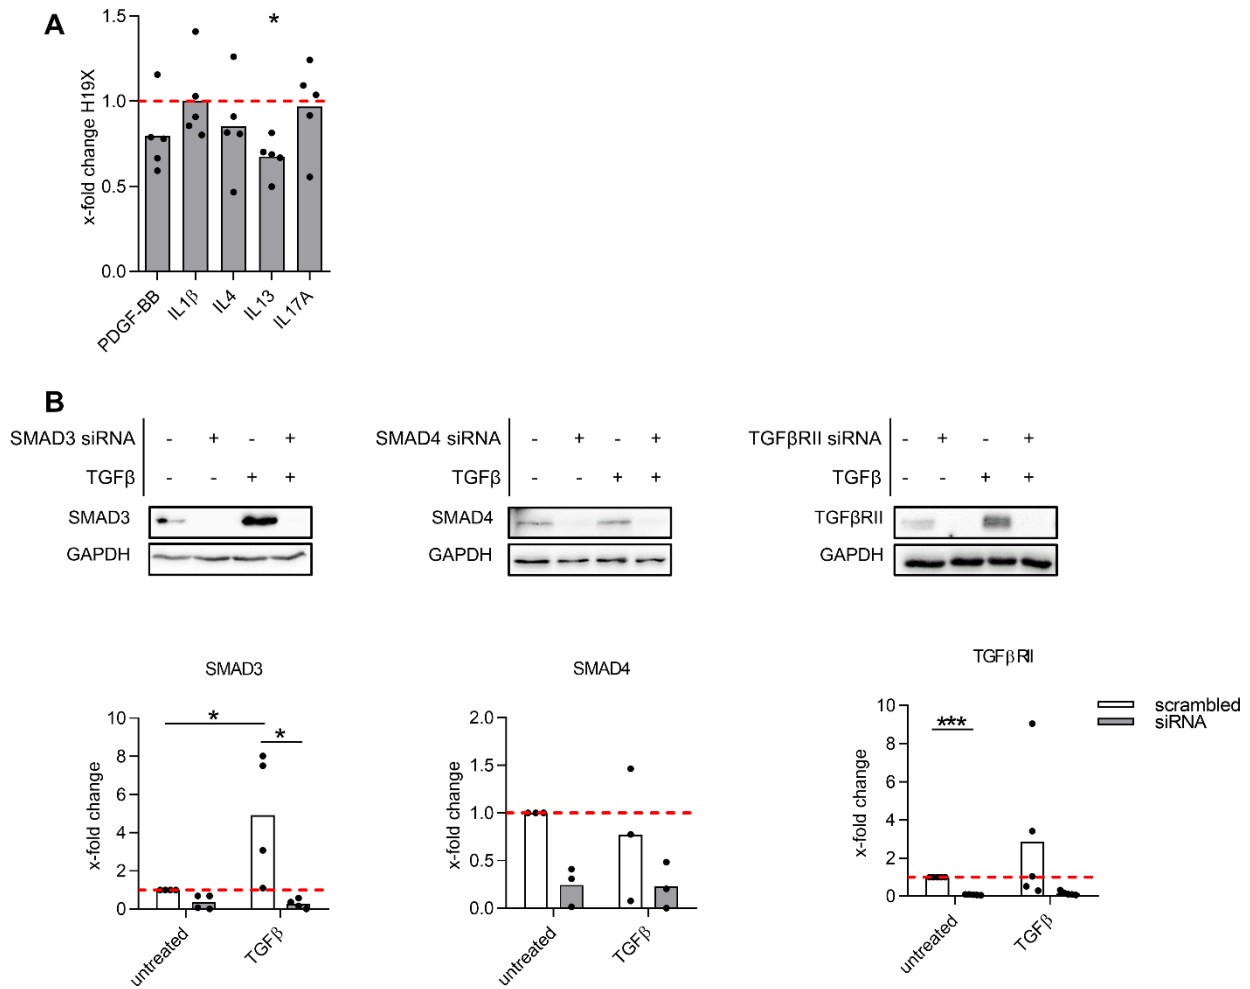

**Supplementary Figure 3.** SSc fibroblasts were stimulated with PDGF-BB (20ng/ml), IL-1 $\beta$  (10ng/ml), IL-4 (10ng/ml), IL-13 (10ng/ml) or IL-17a (10ng/ml) for 24h. H19X expression was measured by qPCR and normalized to *GAPDH* and *RPLP0* (A). *TGFBR2* and *SMADs* silencing was performed in SSc fibroblasts with 50nM siRNA for a total of 54h and stimulated with TGF $\beta$  for the last 6h in 1% FBS medium. Western blot analysis for SMAD3, SMAD4 and TGF $\beta$ R2 pictures are representative of n=3-5 biological replicates and corresponding densitometric analysis (B). Fold change was calculated compared to untreated controls set as 1 (dashed line). Data are presented as mean and single of n=3-5 biological replicates. One-way ANOVA (A, B). \* p<0.05, \*\*\* p<0.001.



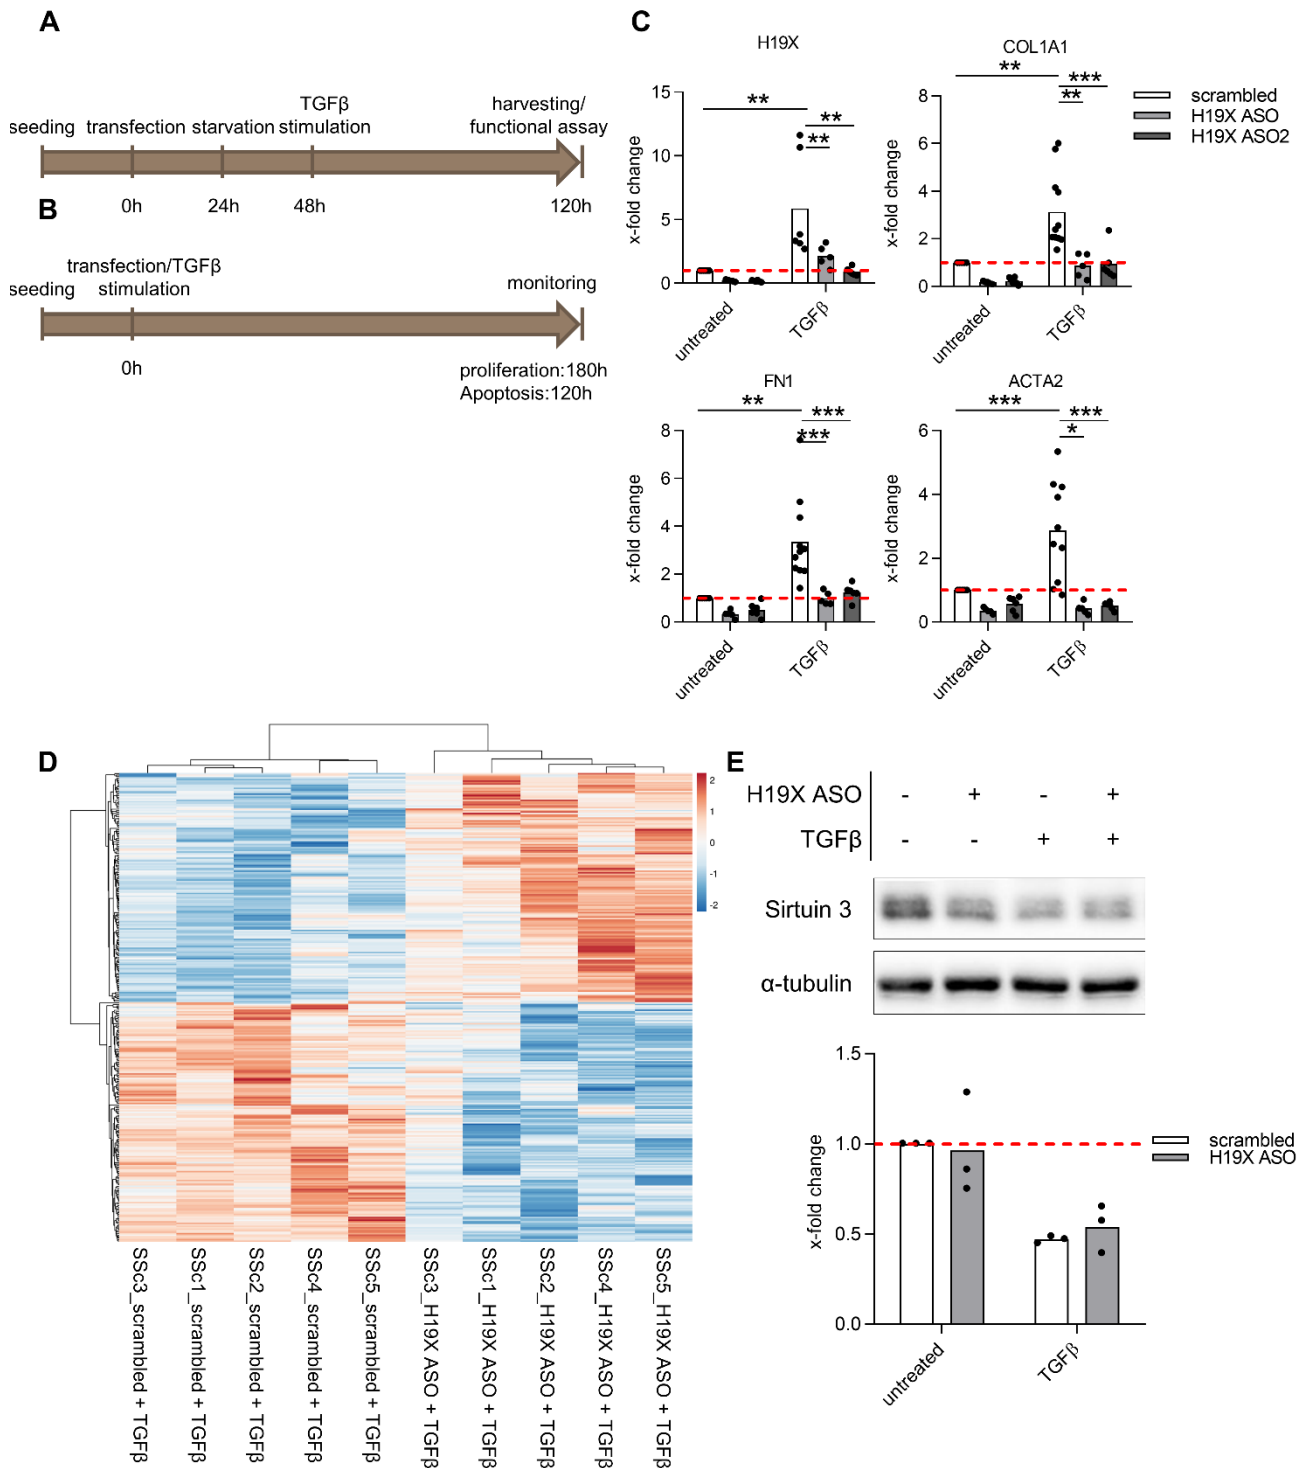

**Supplementary Figure 4.** Schematic representation of the experimental set-up used to characterize ECM production and myofibroblast activation after H19X silencing (A). Schematic representation of the experimental set-up used to characterize cell cycle and cell apoptosis after H19X silencing (B). H19X silenced was performed with 2 different sets of ASOs (ASO and ASO2). *H19X*, *COL1A1*, *FN1* and *ACTA2* expression was measured by qPCR and normalized to *GAPDH* and *RPLP0*. Fold change was calculated compared to controls set as 1 (dashed line). Data are presented as single values and mean (n=5-6). One-way ANOVA. \* p<0.05, \*\* p<0.01, \*\*\* p<0.001 (C). H19X was silenced in dermal SSc fibroblasts with 25nM ASO for a total of 120h and stimulated with TGFβ for the last 72h in 1% FBS medium. Heatmap showing 317 differentially expressed gene identify by microarray experiment at a FDR of <5% and  $Log_2FC > |0.5|$  and unsupervised hierarchical clustering. Differential expression analysis was carried out using 'limma' R-package (D). Sirtuin-3, protein levels were analyzed by Western blot. Pictures are representative of n=3 biological replicates. The protein level was semi-quantified by densitometric analysis. For Western blot, semi-quantification fold change was calculated compared to controls set as 1 (dashed line) (E).

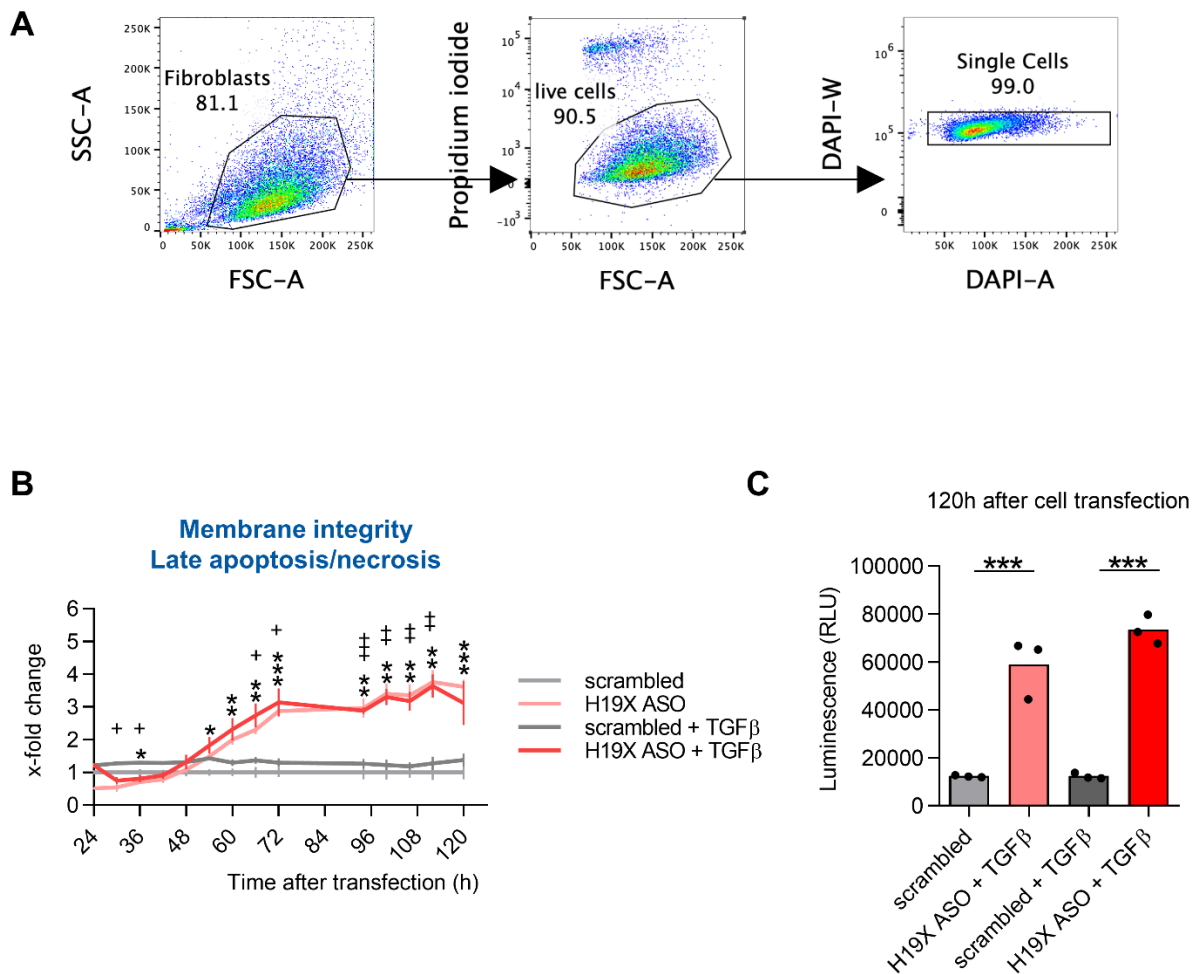

**Supplementary Figure 5.** H19X was silenced in dermal SSc fibroblasts with 25nM ASO for a total of 120h and stimulated with TGF $\beta$  for the last 48h in 1% FBS medium. Cells were stained with Hoechst 33342. Forward and side scattergrams (FSC/SSC) were used to select total cells. Next, living cells were selected as propidium iodide (PI) negative cell population (A). Fluorescence (DNA dye) as a measure of necrosis was recorded every 6h starting 24h until 120h after cell transfection. Fold change was calculated relative to scrambled control. \* indicate significance for untreated cells, + indicate significance for TGF $\beta$  stimulated cells (B). Caspases 3/7 activity measured at 120h after cell transfection (C). Data are presented as single values and mean (n=3-5). One-way ANOVA (C). Two-way ANOVA (B). \* p<0.05, \*\* p<0.01, \*\*\* p<0.001.

**A**

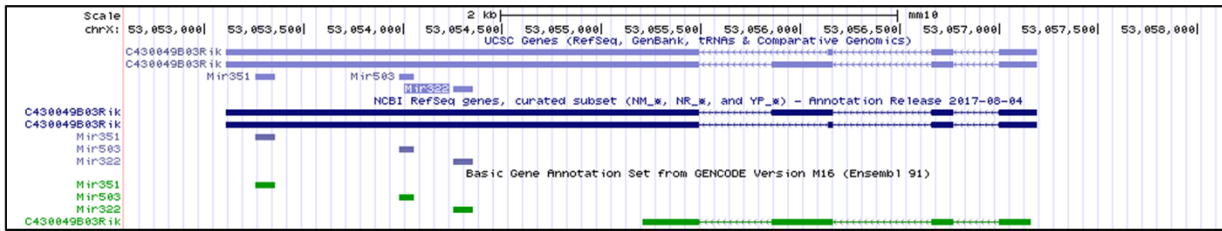

**B**

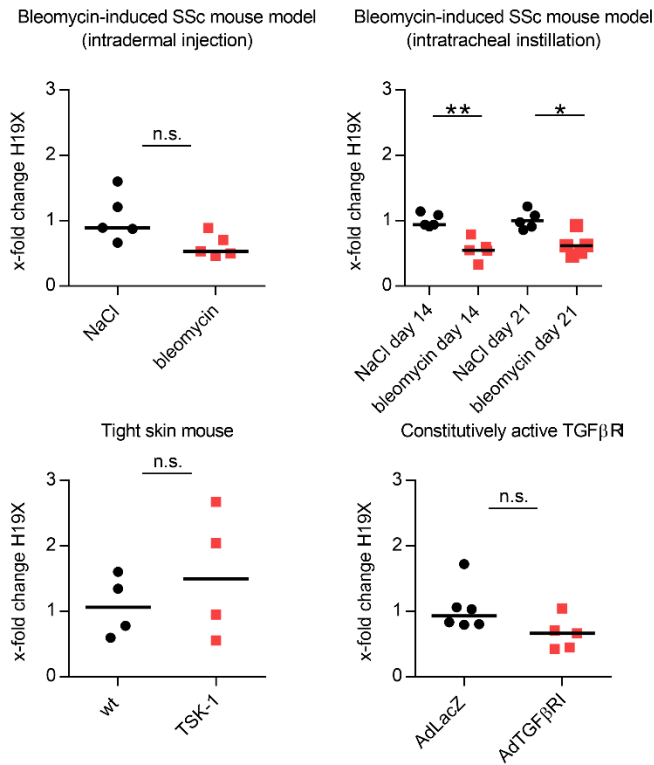

**C**

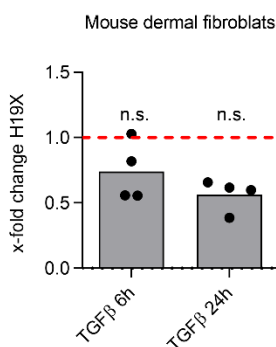

**Supplementary Figure 6.** Schematic representation of the putative murine H19X (mH19X) locus as annotated in the NCBI Reference Sequence Database (RefSeq, blue) and GENCODE consortium version M16 (green) (A). mH19X expression was measured in 4 established SSc mouse models: bleomycin-induced skin fibrosis (skin), bleomycin-induced lung fibrosis using intratracheal installation (lung), tight skin mouse-1 (skin), injections of adenovirus overexpressing a constitutively active TGFβR1 (skin). H19X expression was measured by qPCR and normalized to *Gapdh*. Data are presented as single values and median (n=4-6). Mann-Whitney test. \* p<0.05, \*\* p<0.01, n.s., non-significant (B). mH19X expression was measured in mouse dermal fibroblasts after 6 and 24h of TGFβ stimulation. mH19X expression was measured by qPCR and normalized to *Gapdh*. Fold change was calculated compared to untreated controls set as 1 (dashed line). Data are presented as mean and single values of 4 biological replicates. T-test. n.s., non-significant (C).

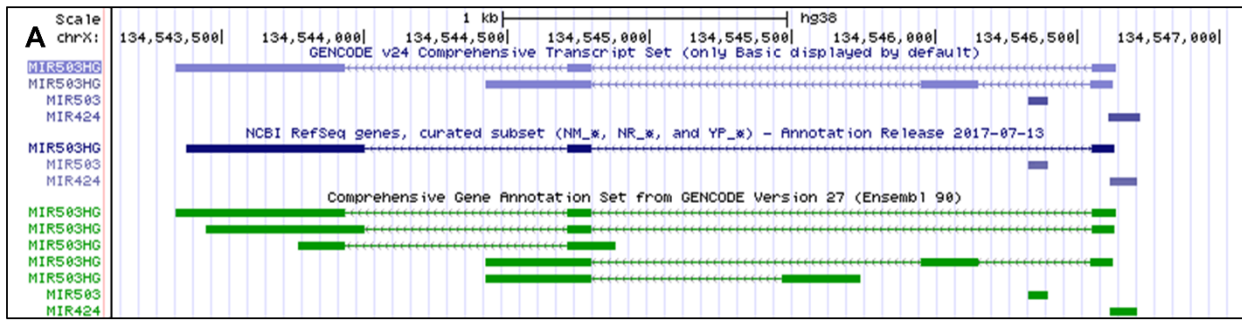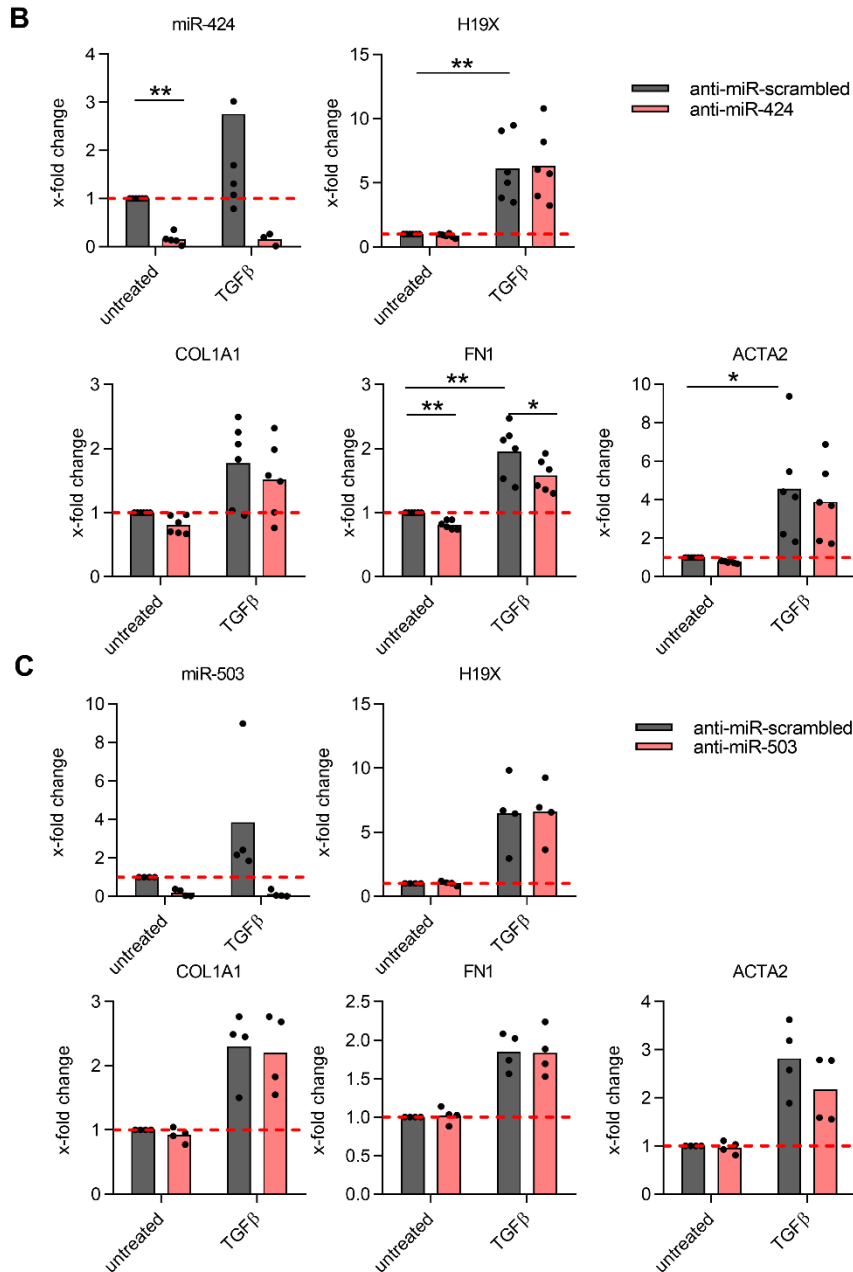

**Supplementary Figure 7.** LncRNA *H19X* gene is localized on the chromosome X, the same locus encodes also for miR-424 and miR-503 (A). SSc fibroblasts were transfected 100nM of anti-miR-424 or anti-miR-503 for 72h and stimulated for the last 24h with TGFβ in 1% FBS medium (B and C). Expression of miR-424 and miR-503 was analyzed by qPCR and normalized to RNU48. *H19X*, *COL1A1*, *FN1* and *ACTA2* expression was measured by qPCR and normalized to *GAPDH* and *RPLP0*. Fold change was calculated respective to untreated control set as 1 (dashed line). Data are presented as single values and mean (n=5-6). One-way ANOVA (B, C). \* p<0.05, \*\* p<0.01.

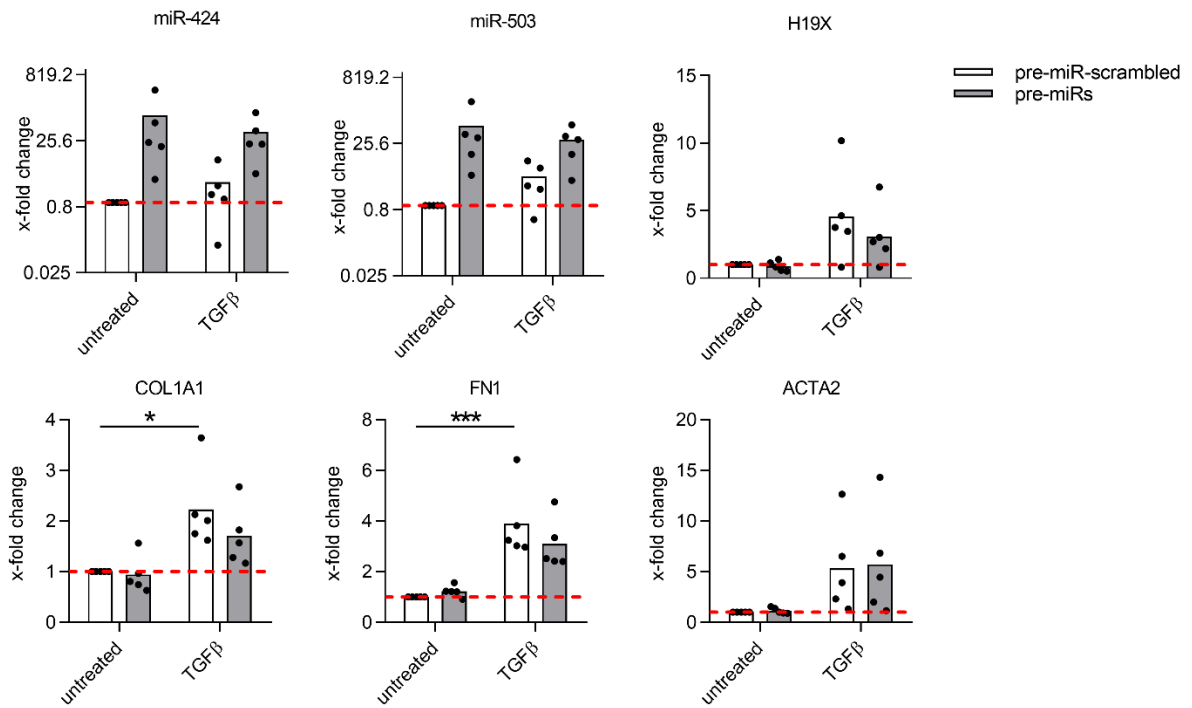

**Supplementary Figure 8.** SSc fibroblasts were transfected 100nM of pre-miR (miR-424 and miR-503 simultaneously anti-miR-503 for 120h and stimulated for the last 72h with TGFβ in 1% FBS medium). Expression of miR-424 and miR-503 was analyzed by qPCR and normalized to RNU48. H19X, COL1A1, FN1 and ACTA2 expression was measured by qPCR and normalized to GAPDH and RPLP0. Fold change was calculated respective to untreated control set as 1 (dashed line). Data are presented as single values and mean (n=5). One-way ANOVA. \* p<0.05, \*\* p<0.01.

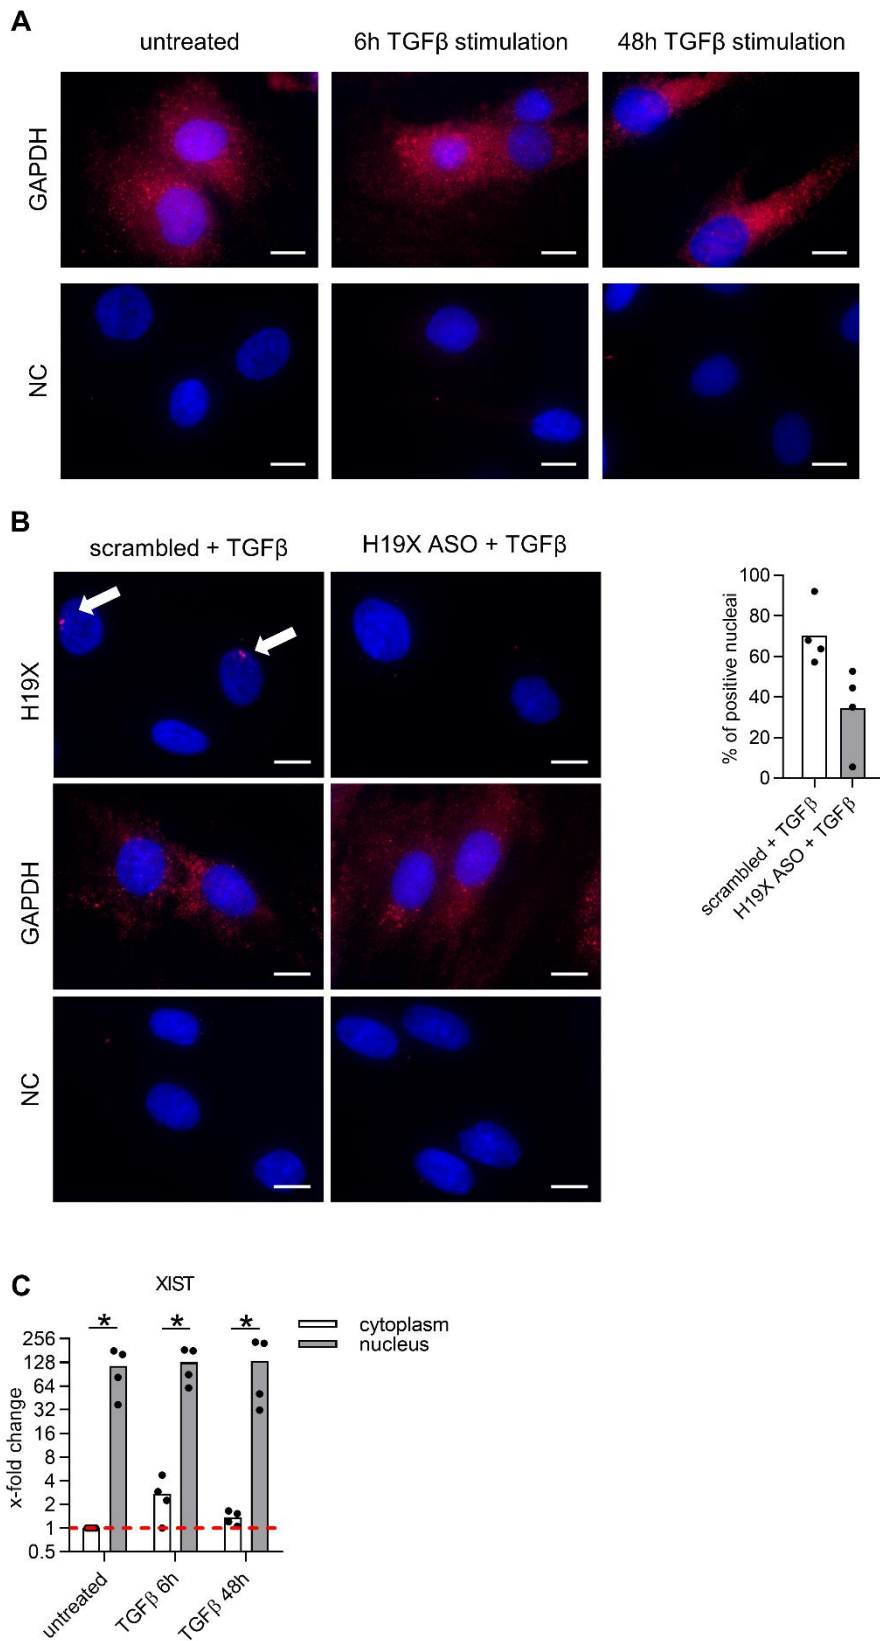

**Supplementary Figure 9.** SSc fibroblasts were stimulated for 6 or 48h with TGF $\beta$  in 1% FBS medium and FISH staining was performed targeting *GAPDH* as positive control. Hybridization buffer without probes was used to assess background signal (NC). Scale: 10 $\mu$ m. Pictures are representative of n=4 biological replicates (A). To verify probe specificity, SSc fibroblasts were transfected with 25nM of ASO targeting H19X for 96h and stimulated for the last 48h with TGF $\beta$  in 1% FBS medium. FISH staining was performed targeting H19X and *GAPDH* as positive control. Hybridization buffer without probes

was used to assess background signal (NC). Scale: 10 $\mu$ m. Pictures are representative of n=4 biological replicates. Percentage of nuclei positive for H19X staining (B). Cell fractions were obtained from SSc fibroblasts stimulated with TGF $\beta$  for 6 or 48h in 1% FBS. XIST expression was used to evaluate successful cell fractionation (C). Fold change was calculated respective to control (dashed line). Data are presented as mean and single values of n=4 biological replicates. T-test (B) and One-way ANOVA (C). \* p<0.05; \*\* p<0.01; \*\*\* p<0.001.

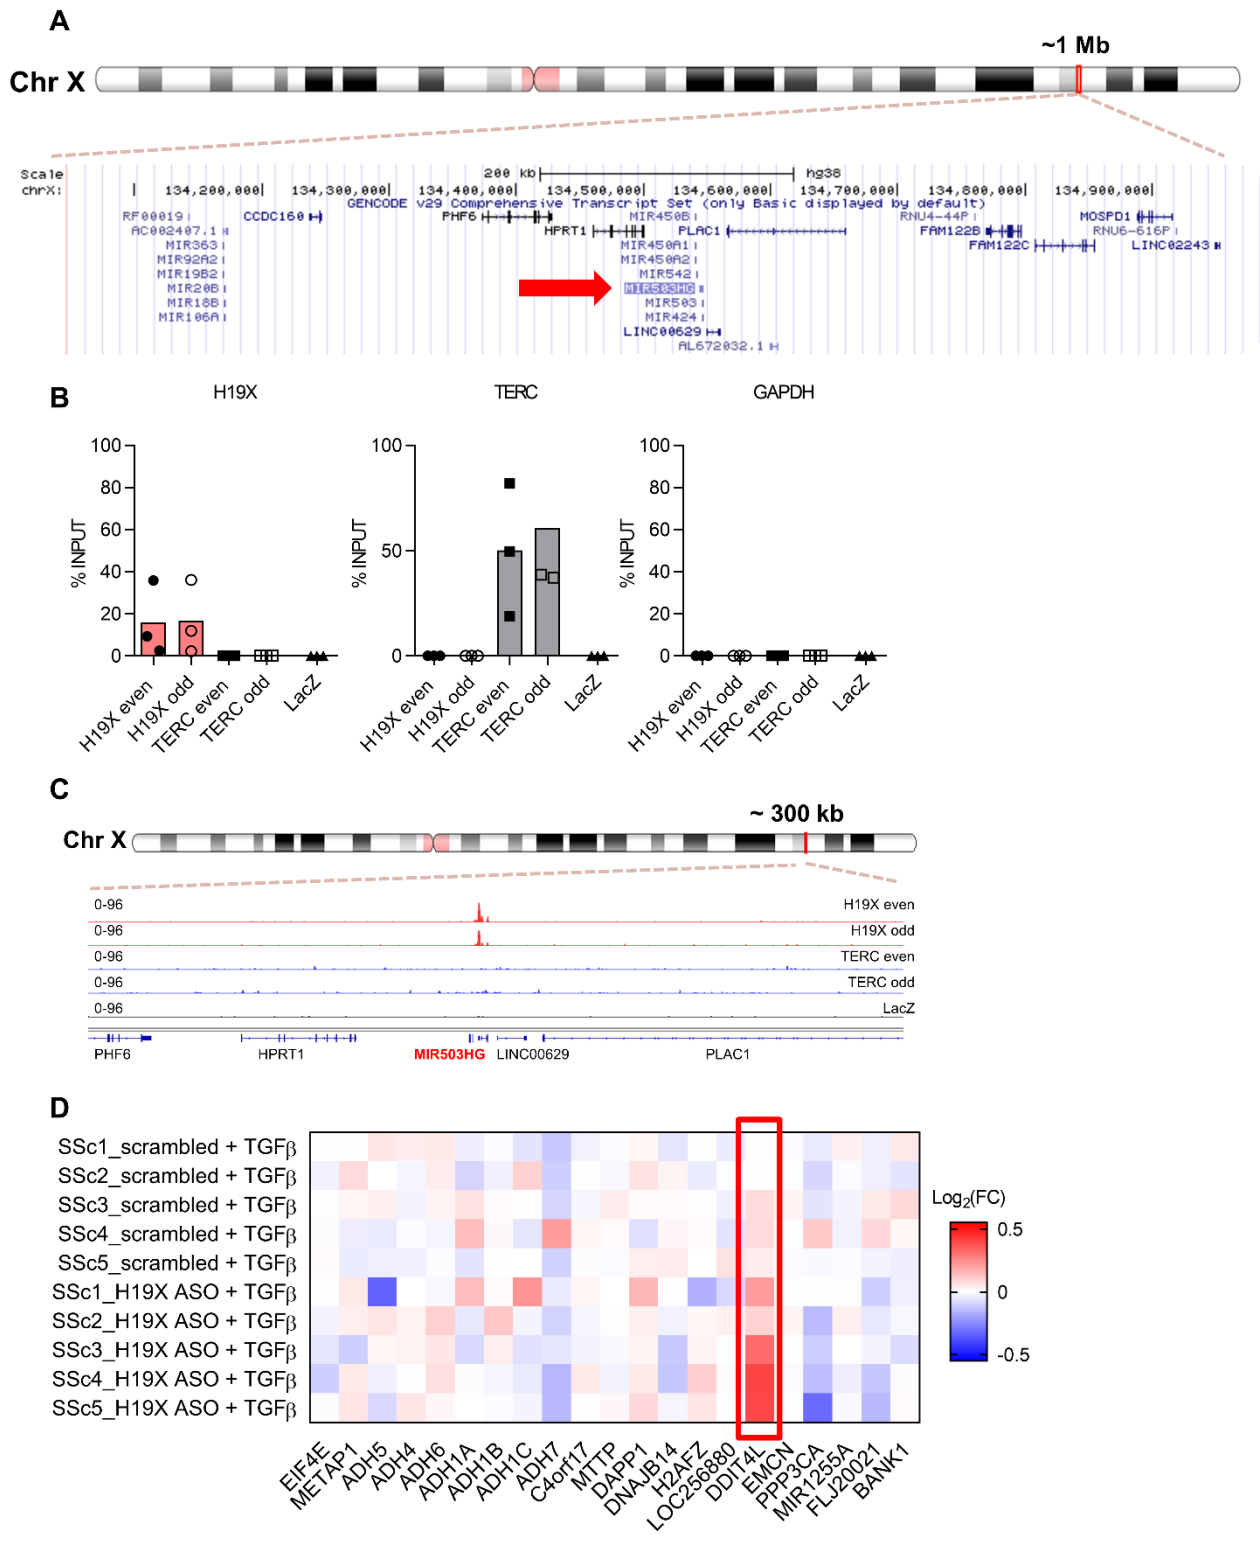

**Supplementary Figure 10.** Schematic representation of *H19X* (*MIR503HG*) locus and its neighboring genes spanning 1Mb (A). BJ5TA cells were stimulated with TGF $\beta$  for 6h in 1% FBS medium. RNA retrieval after ChIP experiments was assessed by qPCR and shown as % respective to the input. *GAPDH* was used to assess the assay specificity. Data are presented as mean and single value of n=3 independent experiments (B). ChIP peaks for H19X capture are shown as fold enrichment relative to input for two sets of probes (even, odd, red tracks), TERC probes were used to validate the method. *LacZ* probes were used as negative control. Specific peak at the H19X transcription start site was identified (C). Heatmap showing expression of the gene within the same genomic region of *DDIT4L* (in red) as measured by microarray analysis following H19X silencing (D).



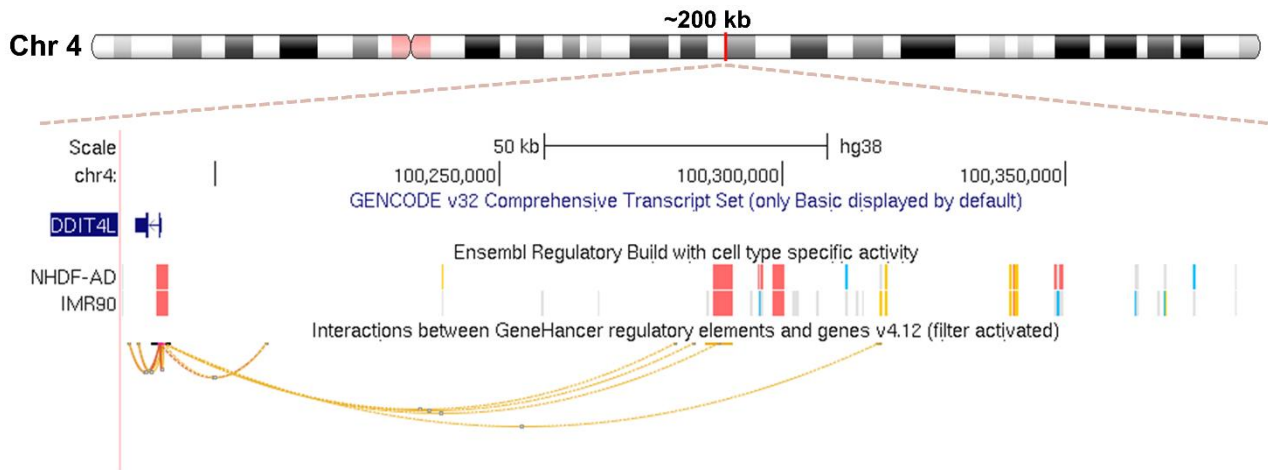

**Supplementary Figure 11.** GeneHancer results for *DDIT4L* promoter showing interactions with *DDIT4L* enhancer. Ensembl Regulatory Annotation for DNA regulatory elements and activity in IMR90 cell line (fibroblasts) and adult normal human dermal fibroblasts (NHDF-AD), in red predicted active promoter flanking regions, in yellow unannotated active open chromatin regions, in blue active CTCF binding sites, in grey inactive regions.

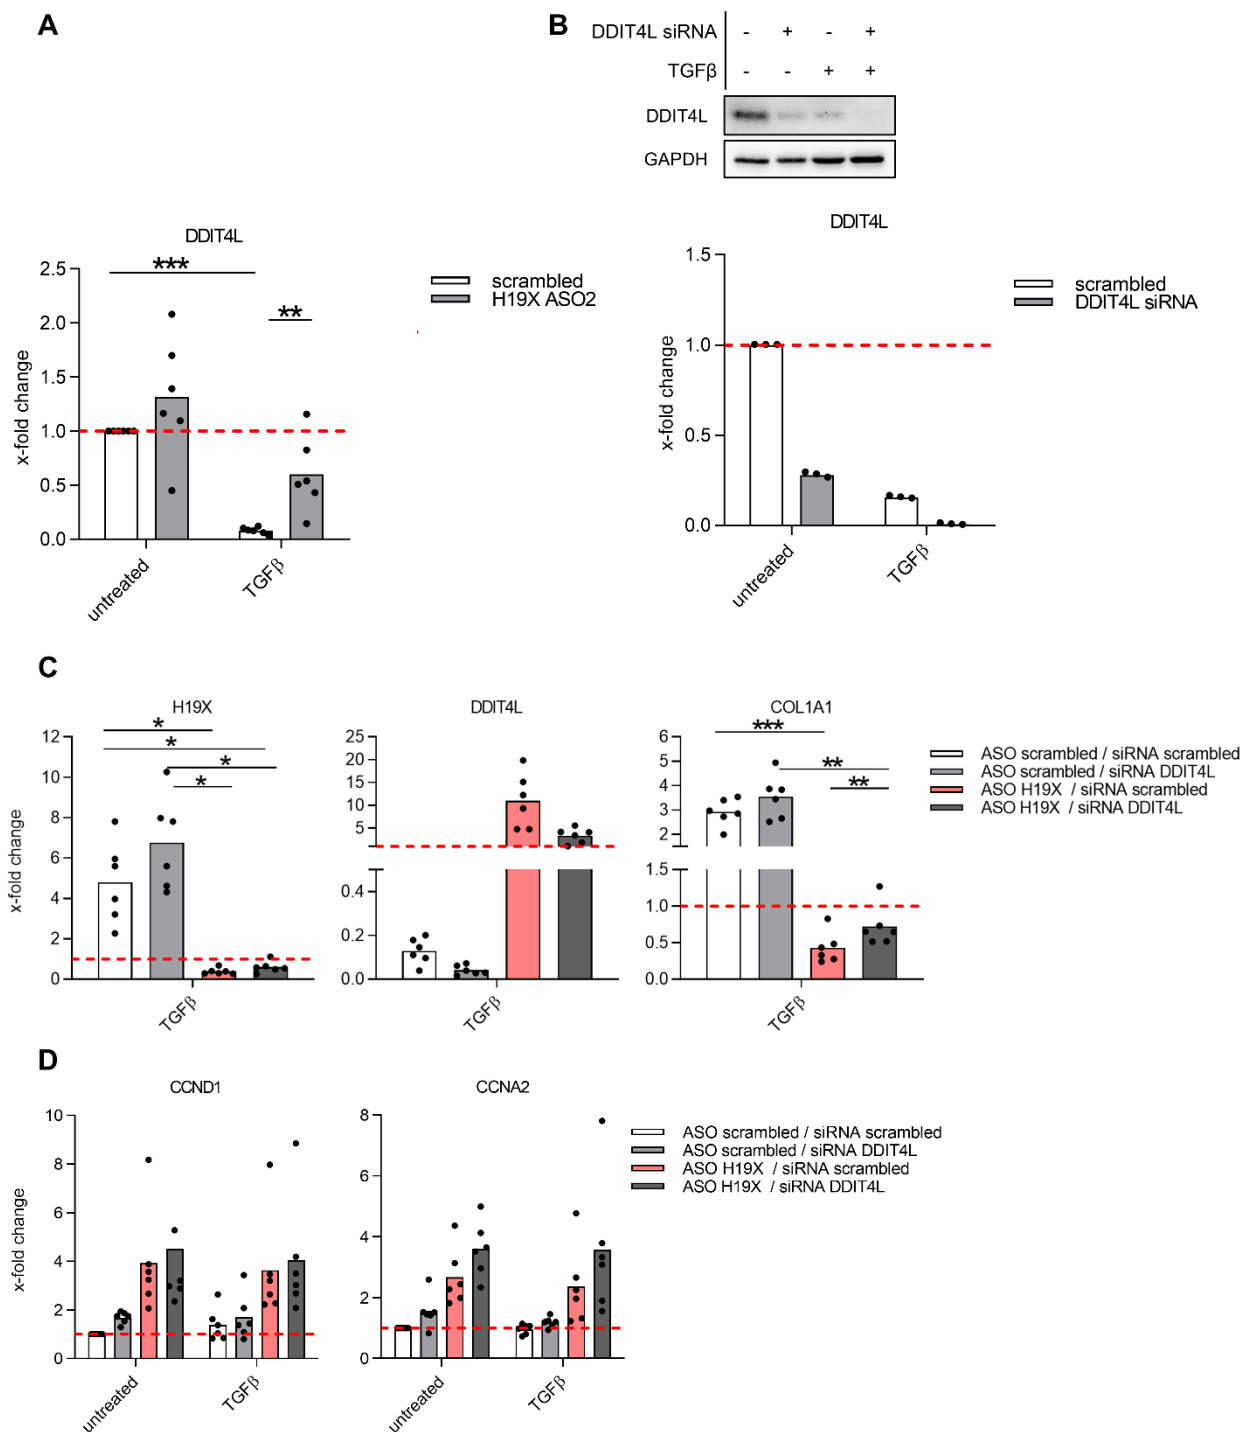

**Supplementary Figure 12.** H19X was silenced in dermal SSc fibroblasts with 25nM ASO\_2 for a total of 120h and stimulated with TGFβ for the last 72h in 1% FBS medium. H19X silenced was performed with a second set of ASO (ASO\_2). *DDIT4L* expression was measured by qPCR and normalized to *GAPDH* and *RPLP0*. Data are presented as single values and mean (n=6) (A). *DDIT4L* silencing was performed in SSc fibroblasts with 50nM siRNA for 120h and TGFβ stimulated for the last 72h in 1%FBS medium. Western blot analysis for *DDIT4L* (pictures are representative of n=3 biological replicates), corresponding densitometric analysis Data are presented as mean and single values (n=3) (B). SSc fibroblasts were transfected with 25nM of ASO and 50nM of siRNA for 120h and stimulated with TGFβ for the last 72h in 1% FBS medium. Expression of *H19X*, *DDIT4L*, *COL1A1* (TGFβ stimulated samples, C) *CCNA2* and *CCND1* (D) was analyzed by qPCR and normalized to *GAPDH* and *RPLP0*. Data are presented as single values and mean (n=6). Fold change was calculated compared to controls set as 1 (dashed line). One-way ANOVA (A-D). \* p<0.05, \*\* p<0.01, \*\*\* p<0.001.

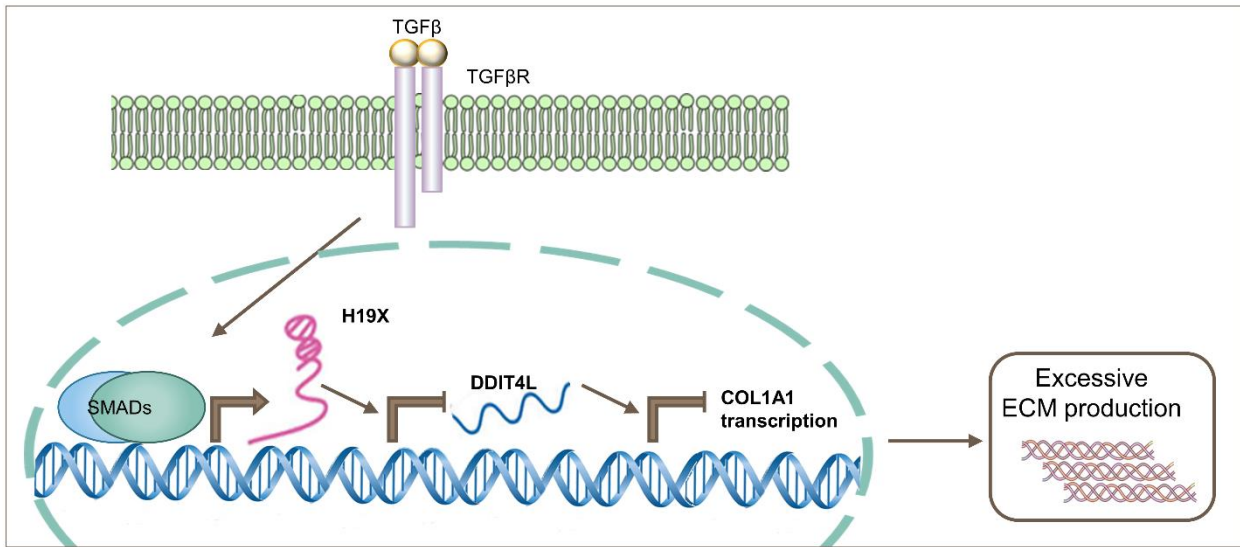

**Supplementary Figure 13.** Schematic representation of H19X mechanism. TGFβ pathway induces H19X expression which in turn decrease *DDIT4L* expression. The lack of the repressor, *DDIT4L*, results in enhanced *COL1A1* transcription and therefore in ECM accumulation.

**Supplementary Table 1.** H19X transcripts coding potential assessment. Coding potential assessment tool (CPAT) was used to calculate coding potential for each transcript variant. Human coding probability (CP) cutoff: 0.364

| <i>Transcript ID</i>     | <i>RNA Size (nt)</i> | <i>ORF Size (nt)</i> | <i>Fickett Score</i> | <i>Hexamer Score</i> | <i>Coding Probability (CP)</i> | <i>Coding Label</i> |
|--------------------------|----------------------|----------------------|----------------------|----------------------|--------------------------------|---------------------|
| <i>ENST00000440570.5</i> | 760                  | 147                  | 0.8435               | -0.0335              | 0.0159                         | No                  |
| <i>ENST00000414769.1</i> | 720                  | 138                  | 0.4527               | -0.1723              | 0.0017                         | No                  |
| <i>ENST00000441492.1</i> | 649                  | 270                  | 0.5757               | 0.0833               | 0.0543                         | No                  |
| <i>ENST00000457876.5</i> | 646                  | 117                  | 1.0186               | -0.2711              | 0.0042                         | No                  |
| <i>ENST00000445415.1</i> | 332                  | 72                   | 0.7253               | -0.3612              | 0.0006                         | No                  |
| <i>ENST00000440570.5</i> | 760                  | 147                  | 0.8435               | -0.0335              | 0.0159                         | No                  |

**Supplementary Table 2.** Correlation analysis of H19X expression with TGFβ genes (KEGG Pathway database). Significant correlations are highlighted in pink (Pearson  $p < 0.05$ ). Genes with significant correlations and Pearson correlation coefficients  $r > |0.5|$  are marked in red.

| TGFβ pathway gene (symbol) | Pearson correlation coefficient (r) | Pearson p-value | TGFβ pathway gene (symbol) | Pearson correlation coefficient (r) | Pearson p-value |
|----------------------------|-------------------------------------|-----------------|----------------------------|-------------------------------------|-----------------|
| TGFBR1                     | 0.746617561                         | 1.86E-15        | ACVR1C                     | 0.160573492                         | 0.154776653     |
| GDF6                       | 0.695810054                         | 7.85E-13        | PPP2R1A                    | 0.159104039                         | 0.158637155     |
| BMPR2                      | 0.672841557                         | 8.14E-12        | BMP2                       | -0.148052159                        | 0.189988414     |
| TGFBR2                     | 0.617367236                         | 1.07E-09        | ACVR2A                     | -0.147359103                        | 0.192093785     |
| TGFB3                      | 0.557046663                         | 8.04E-08        | AMH                        | 0.137265585                         | 0.224680968     |
| THBS1                      | 0.54172736                          | 2.11E-07        | DCN                        | -0.137153235                        | 0.225064244     |
| TGFB1                      | 0.508543099                         | 1.46E-06        | ID3                        | 0.133168653                         | 0.238954509     |
| RHOA                       | 0.485290914                         | 5.06E-06        | SMAD2                      | 0.130631789                         | 0.248100933     |
| ID4                        | -0.455383118                        | 2.19E-05        | SMURF1                     | -0.126585936                        | 0.263179558     |
| SMURF2                     | 0.447250816                         | 3.19E-05        | SKP1                       | -0.12155539                         | 0.282776946     |
| INHBA                      | 0.435198604                         | 5.48E-05        | TFDP1                      | 0.118255295                         | 0.296146891     |
| ACVR1                      | 0.429929002                         | 6.89E-05        | SMAD5                      | -0.116837389                        | 0.30201673      |
| ROCK1                      | 0.420708595                         | 0.000102049     | BMP8B                      | -0.115351522                        | 0.308248827     |
| SMAD7                      | 0.404661965                         | 0.000196853     | RBL1                       | -0.113808641                        | 0.3148077       |
| BMPR1B                     | 0.398413911                         | 0.000252005     | MAPK1                      | -0.112845802                        | 0.318946026     |
| E2F4                       | 0.382456868                         | 0.000463401     | PITX2                      | 0.11089513                          | 0.327436633     |
| BMP6                       | 0.38238945                          | 0.000464565     | IFNG                       | 0.107941287                         | 0.3405649       |
| TGIF1                      | 0.331393886                         | 0.002675363     | BMP7                       | -0.100925166                        | 0.373051363     |
| ACVR1B                     | -0.322317441                        | 0.003548169     | CUL1                       | -0.087066867                        | 0.442514895     |
| PPP2CB                     | 0.298040027                         | 0.007250548     | BAMBI                      | -0.084052182                        | 0.458531736     |
| TGIF2                      | 0.295064794                         | 0.007883        | EP300                      | 0.070231431                         | 0.535884946     |
| ID1                        | -0.292802439                        | 0.008395848     | MAPK3                      | -0.064962042                        | 0.566984149     |
| ACVR2B                     | -0.291996078                        | 0.008585588     | SMAD6                      | 0.06122142                          | 0.589563033     |
| PPP2R1B                    | 0.291513385                         | 0.008700958     | MINOS1-NBL1                | -0.054859895                        | 0.628866091     |
| SP1                        | -0.290104122                        | 0.009045597     | ZFYVE16                    | 0.050405004                         | 0.657025961     |
| MYC                        | 0.285498903                         | 0.010256545     | BMP8A                      | 0.039743059                         | 0.726326355     |
| GDF7                       | -0.266125434                        | 0.017031116     | RBX1                       | -0.038540392                        | 0.734295935     |
| ID2                        | -0.256475826                        | 0.0216506       | BMP5                       | 0.036519583                         | 0.747750034     |
| ZFYVE9                     | -0.243313051                        | 0.029644846     | CDKN2B                     | -0.028775212                        | 0.799978371     |
| CHRD                       | 0.240098547                         | 0.031937342     | BMP4                       | -0.019933316                        | 0.860686454     |
| SMAD4                      | -0.222371242                        | 0.047418415     | INHBE                      | 0.009358271                         | 0.934338702     |
| NOG                        | 0.220346276                         | 0.049526531     | GDF5                       | -0.009341298                        | 0.934457527     |
| SMAD3                      | -0.21575431                         | 0.054593517     | SMAD1                      | 0.009279035                         | 0.934893434     |
| BMPR1A                     | -0.207530629                        | 0.064723646     | E2F5                       | -0.007588082                        | 0.94673882      |
| CREBBP                     | 0.194080121                         | 0.084522365     | PPP2CA                     | -0.00756829                         | 0.946877539     |
| TGFB2                      | 0.184687125                         | 0.100997861     | INHBC                      | -0.006624434                        | 0.953494658     |
| RPS6KB2                    | -0.182129176                        | 0.10589347      | RPS6KB1                    | -0.002369284                        | 0.983358914     |
| NODAL                      | -0.181481357                        | 0.107162142     | SMAD9                      | -0.002164486                        | 0.984797173     |
| FST                        | 0.177291328                         | 0.115654975     | LEFTY1                     | -0.001038817                        | 0.992703262     |
| LTBP1                      | 0.171481781                         | 0.128277272     | E2F5                       | -0.007588082                        | 0.94673882      |
| INHBB                      | -0.163903424                        | 0.146287944     | PPP2CA                     | -0.00756829                         | 0.946877539     |
| AMHR2                      | -0.162656699                        | 0.149424231     | INHBC                      | -0.006624434                        | 0.953494658     |

**Supplementary Table 3.** Correlation analysis of H19X expression with different cell type specific gene signatures Significant correlations are highlighted in pink (Pearson  $p < 0.05$ ). Fibroblast gene signature is marked in red.

| <b>Cell type</b>                      | <b>Pearson correlation coefficient (r)</b> | <b>Pearson p-value</b> |
|---------------------------------------|--------------------------------------------|------------------------|
| <b>Fibroblast</b>                     | <b>0.5919</b>                              | <b>&lt;.0001</b>       |
| <i>Hair outer root sheath</i>         | -0.3905                                    | 0.0027                 |
| <i>Keratinocyte</i>                   | -0.3565                                    | 0.0065                 |
| <i>M2 Macrophage</i>                  | 0.2983                                     | 0.0242                 |
| <i>M1 Macrophage</i>                  | 0.2816                                     | 0.0338                 |
| <i>Monocyte</i>                       | 0.2685                                     | 0.0434                 |
| <i>B cell</i>                         | 0.2571                                     | 0.0535                 |
| <i>NK cell</i>                        | 0.2527                                     | 0.0579                 |
| <i>Microvascular endothelial cell</i> | 0.2321                                     | 0.0823                 |
| <i>CD8+ T cell</i>                    | 0.1762                                     | 0.1898                 |
| <i>Melanocyte</i>                     | -0.1488                                    | 0.2694                 |
| <i>CD4+ T cell</i>                    | 0.1349                                     | 0.3172                 |
| <i>Plasma Cell</i>                    | 0.1096                                     | 0.4169                 |
| <i>Dendritic cell</i>                 | 0.1091                                     | 0.4193                 |
| <i>Neutrophil</i>                     | -0.0008                                    | 0.9952                 |

**Supplementary Table 4.** Expression of genes of the same genomic region (within 1 Mb) as H19X after H19X silencing

| <b>Symbol</b>   | <b>Description</b>                       | <b>Location<br/>(GENECODE v29)</b> | <b>log2FC<br/>(n=5)</b> | <b>adj p-value<br/>(n=5)</b> |
|-----------------|------------------------------------------|------------------------------------|-------------------------|------------------------------|
| <i>PLAC1</i>    | placenta-specific 1                      | chrX:134,565,838-<br>134,658,483   | 0.12                    | 0.69                         |
| <i>FAM122B</i>  | family with sequence similarity 122B     | chrX:134,769,566-<br>134,797,134   | -0.04                   | 0.98                         |
| <i>FAM122C</i>  | family with sequence similarity 122C     | chrX:134,807,194-<br>134,854,591   | -0.08                   | 0.93                         |
| <i>MOSPD1</i>   | motile sperm domain containing 1         | chrX:134,887,626-<br>134,915,267   | 0.56                    | 0.54                         |
| <i>MIR450B</i>  | microRNA 450B                            | chrX:134,540,185-<br>134,540,262   | -0.05                   | 0.92                         |
| <i>MIR450A1</i> | microRNA 450A1                           | chrX:134,540,341-<br>134,540,431   | 0.38                    | 0.66                         |
| <i>MIR450A2</i> | microRNA 450A2                           | chrX:134,540,508-<br>134,540,607   | 0.04                    | 0.93                         |
| <i>MIR542</i>   | microRNA 542                             | chrX:134,541,341-<br>134,541,437   | -0.21                   | 0.86                         |
| <i>HPRT1</i>    | hypoxanthine phosphoribosyltransferase 1 | chrX:134,460,153-<br>134,500,668   | 0.13                    | 0.96                         |
| <i>PHF6</i>     | PHD finger protein 6                     | chrX:134,373,253-<br>134,428,790   | 0.10                    | 0.89                         |
| <i>MIR106A</i>  | microRNA 106A                            | chrX:134,170,198-<br>134,170,278   | 0.12                    | 0.90                         |
| <i>MIR18B</i>   | microRNA 18B                             | chrX:134,170,041-<br>134,170,111   | 0.17                    | 0.70                         |
| <i>MIR20B</i>   | microRNA 20B                             | chrX:134,169,809-<br>134,169,877   | -0.04                   | 0.87                         |
| <i>MIR19B2</i>  | microRNA 19B2                            | chrX:134,169,671-<br>134,169,766   | -0.09                   | 0.81                         |
| <i>MIR92A2</i>  | microRNA 92A2                            | chrX:134,169,538-<br>134,169,612   | 0.08                    | 0.86                         |
| <i>MIR363</i>   | microRNA 363                             | chrX:134,169,378-<br>134,169,452   | -0.02                   | 0.97                         |

**Supplementary Table 5.** List of the 71 genomic regions interacting with H19X as detected by ChIRP-seq.

| Chromosome | Start     | End       | Distance to feature | Gene name            | Type            | Fold enrichment H19X_even | Fold Enrichment H19X_odd |
|------------|-----------|-----------|---------------------|----------------------|-----------------|---------------------------|--------------------------|
| chrX       | 134542696 | 134544277 | -1259               | <i>MIR542</i>        | short_noncoding | 50.81                     | 32.51                    |
| chr6       | 144813806 | 144814240 | -480505             | <i>AL024474.2</i>    | long_noncoding  | 19.27                     | 18.32                    |
| chr2       | 105395207 | 105395704 | 32169               | <i>AC108058.1</i>    | long_noncoding  | 17.23                     | 10.23                    |
| chrX       | 134544598 | 134544938 | 1800                | <i>MIR503</i>        | short_noncoding | 16.94                     | 8.08                     |
| chrX       | 134546396 | 134546823 | 2                   | <i>MIR503</i>        | short_noncoding | 15.88                     | 10.07                    |
| chr11      | 5224897   | 5226135   | -258                | <i>CoTC_ribozyme</i> | short_noncoding | 15.35                     | 10.09                    |
| chr4       | 100375876 | 100376293 | -185094             | <i>DDIT4L</i>        | protein_coding  | 14.29                     | 19.63                    |
| chr2       | 205376600 | 205377032 | -305390             | <i>NRP2</i>          | protein_coding  | 13.95                     | 10.53                    |
| chr8       | 102687401 | 102687815 | 30937               | <i>AP002851.1</i>    | long_noncoding  | 13.43                     | 20.34                    |
| chr2       | 238860800 | 238861238 | 12768               | <i>TWIST2</i>        | protein_coding  | 13.31                     | 18.22                    |
| chr17      | 38599630  | 38600049  | -1419               | <i>AC006449.1</i>    | long_noncoding  | 13.12                     | 19.69                    |
| chr5       | 171291533 | 171291920 | 17222               | <i>AC091980.2</i>    | protein_coding  | 12.70                     | 21.94                    |
| chr4       | 107709930 | 107710403 | 10522               | <i>PAPSS1</i>        | protein_coding  | 12.17                     | 6.35                     |
| chr2       | 44337709  | 44338162  | 24153               | <i>PREPL</i>         | protein_coding  | 12.03                     | 20.21                    |
| chr3       | 37621201  | 37621688  | -47988              | <i>RNU7-73P</i>      | short_noncoding | 11.65                     | 17.32                    |
| chr11      | 119719778 | 119720138 | 9306                | <i>NECTIN1</i>       | protein_coding  | 11.08                     | 10.08                    |
| chr12      | 124913822 | 124914940 | -1725               | <i>MIR5188</i>       | short_noncoding | 10.66                     | 7.81                     |
| chr8       | 38675375  | 38675761  | 29480               | <i>AC016813.1</i>    | long_noncoding  | 10.36                     | 5.59                     |
| chr12      | 71238693  | 71239027  | -120446             | <i>AC025575.2</i>    | long_noncoding  | 10.06                     | 19.63                    |
| chr19      | 8774543   | 8774960   | -46958              | <i>AC008734.1</i>    | long_noncoding  | 9.95                      | 6.84                     |
| chr6       | 166322086 | 166322538 | -13638              | <i>PRR18</i>         | protein_coding  | 9.53                      | 6.89                     |
| chr4       | 79682431  | 79682723  | 18670               | <i>LINC02469</i>     | long_noncoding  | 9.48                      | 8.06                     |
| chr16      | 88521329  | 88521890  | 9724                | <i>AC116552.1</i>    | long_noncoding  | 9.06                      | 23.91                    |
| chr10      | 31663475  | 31663675  | 43913               | <i>AL161935.3</i>    | long_noncoding  | 9.00                      | 12.13                    |
| chr22      | 24550185  | 24550553  | -5318               | <i>SNRPD3</i>        | protein_coding  | 8.61                      | 13.89                    |
| chr1       | 35535023  | 35535434  | -22450              | <i>NCDN</i>          | protein_coding  | 7.94                      | 13.86                    |
| chr13      | 20160276  | 20160676  | 773                 | <i>GJA3</i>          | protein_coding  | 7.94                      | 8.47                     |
| chr1       | 107378301 | 107378694 | 238294              | <i>NTNG1</i>         | protein_coding  | 7.94                      | 14.44                    |
| chr5       | 129649136 | 129649348 | -98943              | <i>KIAA1024L</i>     | protein_coding  | 7.70                      | 11.55                    |
| chr5       | 178564904 | 178565309 | 25651               | <i>COL23A1</i>       | protein_coding  | 7.48                      | 13.46                    |
| chr6       | 155107852 | 155108182 | 148872              | <i>AL596202.1</i>    | long_noncoding  | 7.41                      | 13.86                    |
| chrX       | 78103858  | 78104294  | 35848               | <i>TAF9B</i>         | protein_coding  | 7.38                      | 9.00                     |
| chr6       | 170067112 | 170067432 | -95405              | <i>AL596442.1</i>    | long_noncoding  | 7.37                      | 6.35                     |
| chr20      | 23088706  | 23089023  | -2366               | <i>CD93</i>          | protein_coding  | 7.29                      | 11.69                    |
| chr7       | 102525668 | 102526091 | -7887               | <i>RASA4B</i>        | protein_coding  | 7.04                      | 15.06                    |
| chr9       | 61549528  | 61549732  | -66348              | <i>AL935212.2</i>    | long_noncoding  | 6.98                      | 11.50                    |
| chr13      | 102744748 | 102745132 | 1758                | <i>LINC00283</i>     | long_noncoding  | 6.97                      | 10.53                    |
| chr5       | 135176920 | 135177190 | -45671              | <i>AC008406.1</i>    | long_noncoding  | 6.88                      | 9.24                     |
| chr8       | 26315481  | 26315741  | 23990               | <i>PPP2R2A</i>       | protein_coding  | 6.88                      | 6.35                     |
| chr10      | 31692452  | 31692857  | 14936               | <i>AL161935.3</i>    | long_noncoding  | 6.79                      | 5.88                     |



|       |           |           |         |                        |                 |      |       |
|-------|-----------|-----------|---------|------------------------|-----------------|------|-------|
| chr12 | 42433907  | 42434243  | -20813  | <i>Y_RNA</i>           | short_noncoding | 6.73 | 14.30 |
| chr2  | 180313725 | 180314057 | -306612 | <i>CWC22</i>           | protein_coding  | 6.66 | 11.22 |
| chr17 | 28505123  | 28505455  | -1120   | <i>FOXN1</i>           | protein_coding  | 6.63 | 9.77  |
| chr7  | 102624760 | 102625133 | -8003   | <i>RASA4</i>           | protein_coding  | 6.63 | 16.00 |
| chr17 | 7548656   | 7549132   | -443    | <i>TNFSF12-TNFSF13</i> | protein_coding  | 6.56 | 5.04  |
| chr9  | 129649118 | 129649552 | -6949   | <i>ASB6</i>            | protein_coding  | 6.54 | 14.13 |
| chr2  | 159574954 | 159575259 | -38608  | <i>Y_RNA</i>           | short_noncoding | 6.35 | 5.77  |
| chr3  | 87086778  | 87087111  | -2351   | <i>LINC00506</i>       | long_noncoding  | 6.35 | 13.28 |
| chr13 | 96649955  | 96650417  | 222726  | <i>MIR4501</i>         | short_noncoding | 6.35 | 13.86 |
| chr11 | 27259476  | 27259794  | -39363  | <i>BBOX1-AS1</i>       | long_noncoding  | 6.25 | 7.33  |
| chr12 | 48800332  | 48800665  | -9579   | <i>Y_RNA</i>           | short_noncoding | 6.08 | 14.63 |
| chr20 | 23145264  | 23145536  | -2822   | <i>AL118508.3</i>      | protein_coding  | 6.03 | 5.41  |
| chr19 | 8391299   | 8391685   | -614    | <i>RAB11B-AS1</i>      | long_noncoding  | 6.02 | 15.91 |
| chr12 | 132380712 | 132380975 | 17902   | <i>AC148477.9</i>      | protein_coding  | 6.01 | 10.73 |
| chr7  | 109443752 | 109444183 | -117437 | <i>AC002386.1</i>      | long_noncoding  | 5.82 | 10.97 |
| chr6  | 38109373  | 38109791  | -97901  | <i>SNORD45</i>         | short_noncoding | 5.72 | 10.09 |
| chr8  | 103283204 | 103283431 | -15229  | <i>FZD6</i>            | protein_coding  | 5.33 | 4.60  |
| chr2  | 127515848 | 127516033 | 11038   | <i>IWS1</i>            | protein_coding  | 5.29 | 8.08  |
| chr18 | 59585509  | 59585711  | 21800   | <i>AC090213.1</i>      | long_noncoding  | 5.29 | 8.66  |
| chr1  | 207464805 | 207465221 | 10575   | <i>CR2</i>             | protein_coding  | 5.29 | 15.01 |
| chr1  | 208239727 | 208240119 | 4593    | <i>PLXNA2</i>          | protein_coding  | 5.17 | 12.50 |
| chr2  | 109959574 | 109959927 | 22136   | <i>AC013268.5</i>      | long_noncoding  | 5.12 | 5.49  |
| chr11 | 34908905  | 34909175  | -6924   | <i>PDHX</i>            | protein_coding  | 4.94 | 6.44  |
| chr10 | 124449504 | 124449831 | 680     | <i>NKX1-2</i>          | protein_coding  | 4.86 | 9.68  |
| chr9  | 66817875  | 66818237  | -38551  | <i>ZNF658</i>          | protein_coding  | 4.76 | 9.82  |
| chr8  | 32922873  | 32923180  | -11275  | <i>RNU6-663P</i>       | short_noncoding | 4.76 | 13.28 |
| chr11 | 104975864 | 104976038 | -6428   | <i>CASP4</i>           | protein_coding  | 4.76 | 7.51  |
| chrX  | 96383816  | 96384032  | 26966   | <i>RN7SKP194</i>       | short_noncoding | 4.76 | 5.20  |
| chr2  | 199017711 | 199017925 | 54080   | <i>AC020718.1</i>      | long_noncoding  | 4.76 | 8.08  |
| chr3  | 73614870  | 73615262  | -6843   | <i>PDZRN3-AS1</i>      | long_noncoding  | 4.60 | 18.46 |
| chr18 | 47722278  | 47722569  | -144561 | <i>AC120349.3</i>      | protein_coding  | 4.23 | 12.13 |

**Supplementary Table 6.** Oligonucleotide list.

| <b>Target</b>   | <b>Target Sequence (5'→3')</b> | <b>Product type</b> | <b>Assay ID</b> |
|-----------------|--------------------------------|---------------------|-----------------|
| <i>H19X</i>     | AAAGACCAAGCCCGCG               | ASO                 | 340612-2        |
|                 | TTATTTACACGATCC                | ASO                 | 362822-1        |
|                 | AATCATCTCTCAAAGG               | ASO                 | 362843-1        |
| Scrambled ASO   | GCGTATAGACGTGTT                | ASO                 | 300610          |
| <i>SMAD3</i>    | ATCAAGGGATTTCTATGGAA           | siRNA               | SI00082481      |
|                 | AAGAGATTCTGAATGACGGTAA         | siRNA               | SI00082495      |
|                 | AAGGAGCACCTTGACAGATT           | siRNA               | SI00082502      |
|                 | AGCCTATACTTTGGCAGGTTA          | siRNA               | SI05062645      |
| <i>SMAD4</i>    | AAGCAGCGTCACTCTACCTAA          | siRNA               | SI00076020      |
|                 | CCCTGTTAAACAGTAGTTGTA          | siRNA               | SI00076041      |
|                 | AGCAAGGTTGCACATAGGCAA          | siRNA               | SI03042508      |
|                 | CTCCAGCTCCTAGACGAAGTA          | siRNA               | SI03089527      |
| <i>TGFBR2</i>   | TCGGTTAATAACGACATGATA          | siRNA               | SI02223186      |
|                 | AAAGCCTGGTGAGACTTTCTT          | siRNA               | SI00301910      |
| <i>DDIT4L</i>   | CAGTGATTGAAGGGTCCTAAA          | siRNA               | SI4334974       |
|                 | AACCTCAACGAGGTAATATTT          | siRNA               | SI4180337       |
|                 | CACCGTCCAGATAACCATGCA          | siRNA               | SI4158182       |
|                 | CACGTGAACTTGGAAATTGAA          | siRNA               | SI00360801      |
| scrambled siRNA | AATCTCCGAACGTGTCACGT           | siRNA               | 1027310         |

| <b>Target</b> | <b>Product type</b>                       | <b>Assay ID</b> |
|---------------|-------------------------------------------|-----------------|
| miR-424       | Pre-miR miRNA Precursor                   | PM10306         |
|               | Anti-miR miRNA Inhibitor                  | AM10306         |
| miR-503       | Pre-miR miRNA Precursor                   | PM10378         |
|               | Anti-miR miRNA Inhibitor                  | AM10378         |
| scrambled     | Pre-miR miRNA Precursor Negative Control  | AM17110         |
|               | Anti-miR miRNA Inhibitor Negative Control | AM17010         |

**Supplementary Table 7.** Primer list

| <b>Target</b>         | <b>Forward primer<br/>(5'→3')</b> | <b>Reverse primer<br/>(5'→3')</b> |
|-----------------------|-----------------------------------|-----------------------------------|
| <i>H19X</i>           | GGTGCCAGCCAGCCTTC                 | CGTCCACTGGAGGAAGCC                |
| <i>SERPINE1/PAI-1</i> | CAAGATTGATGACAAGGGCATG            | TCTGTGGTGCTGATCTCATC              |
| <i>ACTA2</i>          | ACAGAGTATTTGCGCTCCG               | CCGACCGAATGCAGAAGGA               |
| <i>COL1A1</i>         | CAGCCGCTTCACCTACAGC               | TTTTGTATTCAATCACTGTCTTGCC         |
| <i>FN1</i>            | GGAGAATTCAAGTGTGACCCTCATG         | TGCCACTGTTCTCCTACGTGG             |
| <i>XIST</i>           | TAGTCATCACAAACAGCAGTTCTTT         | CTTCAATGGGATCAGTATTCTAAAG         |
| <i>DDIT4L</i>         | CTGCTAAGTGATTTTGACTACTG           | GCT TTGATTTGGACAGACAGTT           |
| <i>GAPDH</i>          | GGGAAGCTTGTCATCAATGGA             | TCTCGCTCCTGGAAGATGGT              |
| <i>RPLP0</i>          | ACACTGGTCTCGGACCTGAGAA            | AGCTGCACATCACTCAGAATTTCA          |

**Supplementary Table 8.** FISH and ChIRP-seq probe lists.

| <b><i>Stellaris H19X FISH probe set 1</i></b><br><b>(5'→3')</b> | <b><i>Stellaris H19X FISH probe set 2</i></b><br><b>(5'→3')</b> |
|-----------------------------------------------------------------|-----------------------------------------------------------------|
| GTCCGGCAGACCCACCT                                               | GCTCAATTTTCGATGCATC                                             |
| ACCTGGTGGCAGGAACAC                                              | TCAGGGGGCTGTGTGGAC                                              |
| TACCTGCTCCTGAGCCGG                                              | CAGAAAAGGGCATCACGC                                              |
| GGGTGGTATTCTGATTGG                                              | GGTACAAGGAATGTTTTA                                              |
| GGTTTTCTTCGTTGCCT                                               | GGCACACTGCAACTTGG                                               |
| CGTGGGTGGGGACTGAAG                                              | CATTTTTGTCCTTGGAGG                                              |
| TTACTCCTTTTCCAGTCC                                              | GAGATGCTGGATGCCTTC                                              |
| AGACTTCTTGCAGCTGCT                                              | CCGCCAACAGTGTGATG                                               |
| CAGGAACCGCAGAGAGGT                                              | GGAGTCTTCTGTGTCCAG                                              |
| CAGGACATGAGCGGTTT                                               | ACAGCCTTTGAGAGATGA                                              |
| GCACATCCTCATTCTGGA                                              | TGGGTGGTTTTCAATGCC                                              |
| GGCGCAAAGCAGCTAGAA                                              | ACCCTTCTATTTGGGACA                                              |
| GCAGATTTTTGGGGGAGG                                              | GGAGAGGATTCTTGGAC                                               |
| CGCCGGGTTGGAATTGTG                                              | GCGGGGGGAAAGAAATGG                                              |
| GGGGCGACAAAGGAGTCT                                              | GAAGTGTGGGTATGGGGG                                              |
| AATCGACAGCTCAGGTCC                                              | CTGACTCATTGCGGGGA                                               |
| AAGTCACGAAGGGCTCCT                                              | TCAGTTGAGGTTCCCATC                                              |
| AACAGTGCCAGGACTTT                                               | TTTCTGTGACCCTGGTTA                                              |
| CGACAGTTGTGCAGCACT                                              | CAGAGTTGTGACCACTGC                                              |
| GGGATGGAGGTGGCTTTA                                              | CTTGTCTGTGTGCATGCA                                              |
| GAAGGCTCAGGAGGCCAG                                              | TGTGGGGTTCCACTTTAG                                              |
| TCTTTCAGGAAGGCTGGC                                              | ACAGAGTTGTGACCACTG                                              |
| CACTGGAGGAAGCCGGAT                                              | CTGTGTGCATGCATACAT                                              |
| AACCGGTTCCGTGTCTCA                                              | GGTCCACTTTAGTTCTT                                               |
| AACCGGTCAGGATCCCTG                                              | CCCCTGTTTTCTGTGT                                                |
| CAAGTCAGGATCCCTTGC                                              |                                                                 |
| TTGGATTCCGGGAGGCAA                                              |                                                                 |
| GGAGACCCGGGCAAAAGG                                              |                                                                 |

| <b><i>ChIRP H19X biotinylated probe set ODD</i></b><br><b>(5'→3')</b> | <b><i>ChIRP H19X biotinylated probe set EVEN</i></b><br><b>(5'→3')</b> |
|-----------------------------------------------------------------------|------------------------------------------------------------------------|
| AACACGCGTCCGGCAGAC                                                    | ACCTGGTGGCAGGAACAC                                                     |
| CTTCCTTCTGCTCCTGAG                                                    | TCTTTCAGGAAGGCTGGC                                                     |
| CACTGGAGGAAGCCGGAT                                                    | GAGATGCTGGATGCCTTC                                                     |
| CCGCCAACAGTGTGATG                                                     | GGAGTCTTCTGTGTCCAG                                                     |
| TGGGTGGTTTTCAATGCC                                                    | TGCCAATTGGAACAAAGA                                                     |
| TGGGTATGGGGGAACAGC                                                    | TTTTCCAAGTAACATTGA                                                     |
| GACCCTGGTTATTGACAT                                                    | TTTTCCAAGTAACATTGA                                                     |
| GGGGTTCCACTTTAGTTC                                                    | TGTGACCACTGCCTTTTT                                                     |
| GTTGCCATATTAACGGA                                                     | GTCATTCAATGTCCCAGC                                                     |
